# Stability Indicators in Network Reconstruction

Michele Filosi<sup>1,2,3</sup>, Roberto Visintainer<sup>1,3</sup>, Samantha Riccadonna<sup>3</sup>, Giuseppe Jurman<sup>1\*</sup>, Cesare Furlanello<sup>1</sup>

**1** MPBA/Center for Information and Communication Technology, Fondazione Bruno Kessler, Trento, Italy, **2** CIBIO, University of Trento, Trento, Italy, **3** Department of Computational Biology, Research and Innovation Centre, Fondazione Edmund Mach (FEM), San Michele all'Adige, Italy

## Abstract

The number of available algorithms to infer a biological network from a dataset of high-throughput measurements is overwhelming and keeps growing. However, evaluating their performance is unfeasible unless a 'gold standard' is available to measure how close the reconstructed network is to the ground truth. One measure of this is the stability of these predictions to data resampling approaches. We introduce NetSI, a family of Network Stability Indicators, to assess quantitatively the stability of a reconstructed network in terms of inference variability due to data subsampling. In order to evaluate network stability, the main NetSI methods use a global/local network metric in combination with a resampling (bootstrap or cross-validation) procedure. In addition, we provide two normalized variability scores over data resampling to measure edge weight stability and node degree stability, and then introduce a stability ranking for edges and nodes. A complete implementation of the NetSI indicators, including the Hamming-Ipsen-Mikhailov (HIM) network distance adopted in this paper is available with the R package *nettools*. We demonstrate the use of the NetSI family by measuring network stability on four datasets against alternative network reconstruction methods. First, the effect of sample size on stability of inferred networks is studied in a gold standard framework on yeast-like data from the Gene Net Weaver simulator. We also consider the impact of varying modularity on a set of structurally different networks (50 nodes, from 2 to 10 modules), and then of complex feature covariance structure, showing the different behaviours of standard reconstruction methods based on Pearson correlation, Maximum Information Coefficient (MIC) and False Discovery Rate (FDR) strategy. Finally, we demonstrate a strong combined effect of different reconstruction methods and phenotype subgroups on a hepatocellular carcinoma miRNA microarray dataset (240 subjects), and we validate the analysis on a second dataset (166 subjects) with good reproducibility.

**Citation:** Filosi M, Visintainer R, Riccadonna S, Jurman G, Furlanello C (2014) Stability Indicators in Network Reconstruction. PLoS ONE 9(2): e89815. doi:10.1371/journal.pone.0089815

**Editor:** Alberto de la Fuente, Leibniz-Institute for Farm Animal Biology (FBN), Germany

**Received:** August 26, 2013; **Accepted:** January 27, 2014; **Published:** February 27, 2014

**Copyright:** © 2014 Filosi et al. This is an open-access article distributed under the terms of the Creative Commons Attribution License, which permits unrestricted use, distribution, and reproduction in any medium, provided the original author and source are credited.

**Funding:** The authors acknowledge funding by Fondazione Bruno Kessler. The funders had no role in study design, data collection and analysis, decision to publish, or preparation of the manuscript.

**Competing Interests:** The authors have declared that no competing interests exist.

\* E-mail: jurman@fbk.eu

These authors contributed equally to this work.

## Introduction

The problem of inferring a biological network structure given a set of high-throughput measurements, *e.g.* gene expression arrays, has been addressed by a large number of different methods published in the last fifteen years (see [1,2] for two recent comparative reviews). Solutions range from general purpose algorithms (such as correlation [3] or relevance networks [4]) to methods tailored *ad hoc* for specific data types. Recent examples include SeqSpider [5] for Next Generation Sequencing data, or Sparsity-aware Maximum Likelihood [6] for cis-expression quantitative trait loci (cis-eQTL).

However, network reconstruction is an underdetermined problem, since the number of interactions is significantly larger than the number of independent measurements [7]. Thus, all algorithms must aim to find a compromise between reconstruction accuracy and feasibility: simplifications inevitably detract from the precision of the final outcome by including a relevant number of false positive links [8], which should be discarded *e.g.*, by identifying and removing unwanted indirect relations [9]. Moreover, inference accuracy is strongly dependent on the assumptions used to choose the best hypothetical model of experimental observations [10].

These issues make the inference problem “a daunting task” [11] not only in terms of devising an effective algorithm, but also in terms of quantitatively interpreting the results obtained. In general, reconstruction accuracy is far from optimal in many situations and several pitfalls may occur [12], related to both the methods and the data [13]. In extreme cases, many link predictions are statistically equivalent to random guesses [14]. In particular, it is now widely acknowledged that the size and quality of the data play a critical role in the inference process [15–18]. All these considerations support the opinion that network reconstruction should still be regarded as an unsolved problem [19].

Given the growing list of available algorithms, efforts have been made to develop methods for the objective comparison of network inference methods including the identification of current limitations [20,21] and their relative strengths and disadvantages [7,22]. The most systematic effort is probably the international DREAM challenge [23]: from DREAM 2012 emerged a consensus advocating the integration of predictions from multiple inference methods as an effective strategy to enhance performance [24]. However, algorithm uncertainty has so far been assessed only in terms of performance, *i.e.*, the distance of the reconstructing network from the ground truth, whenever available, while the stability of the methods has been neglected. When no gold

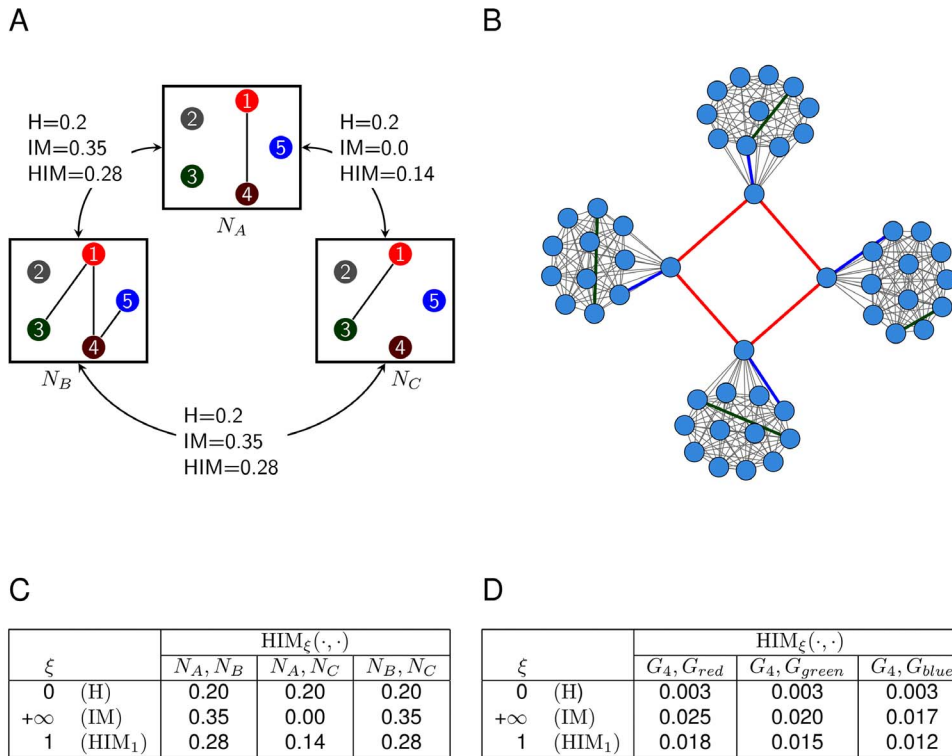

**Figure 1. HIM distance: contribution of H and IM.** (A) An example on three 5-node networks mutually differing by two links. (B) An example on network  $G_4$ , as defined in Subsection *Stability is modularity invariant*.  $G_{red}$ : network  $G_4$  without the four red links.  $G_{green}$ : network  $G_4$  without green links.  $G_{blue}$ : network  $G_4$  without blue links. (C) The mutual differences between the pairs of networks in (A),  $(N_A, N_B)$  and  $(N_A, N_C)$ . (D)  $(G_4, G_{red})$ ,  $(G_4, G_{green})$ ,  $(G_4, G_{blue})$ . In both cases they have the same Hamming distance but different spectral structure, thus resulting in different Ipsen-Mikhailov distances.

doi:10.1371/journal.pone.0089815.g001

standard is available for a given problem, there is no chance to evaluate algorithm accuracy. In such cases we can consider stability as a rule of thumb for judging the reliability of the resulting network. Obviously, the performance of a network reconstruction algorithm and the stability/reliability of the resulting network inferred from a specific dataset are two distinct and equally crucial aspects of the network inference process. The

best way to optimize both aspects would be to adopt only network reconstruction algorithms with well characterized performance, *i.e.*, evaluated in cases where the ground truth is known, and with stability always checked on specific data. It is also worthwhile noting that the evaluation of inference stability is not related to the (chemical or physical) “stability” of the represented process.

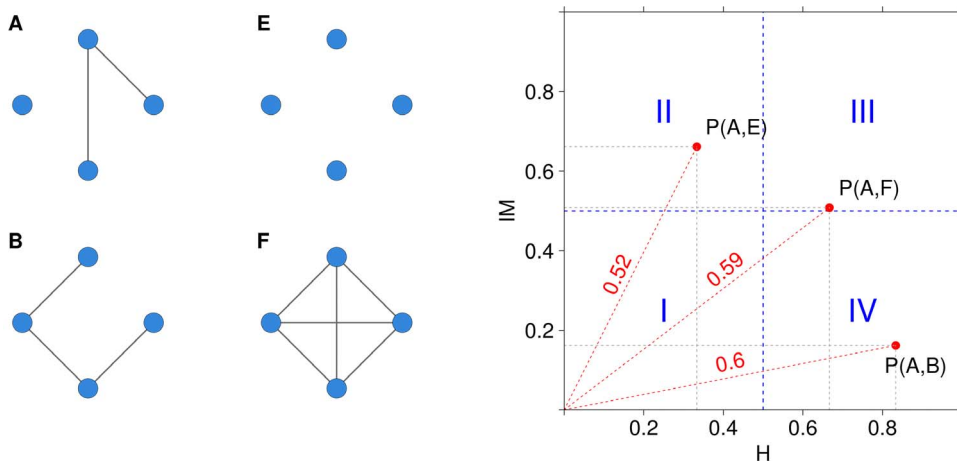

**Figure 2. An example of HIM distance.** Representation of the HIM distance in the Ipsen-Mikhailov (IM axis) and Hamming (H axis) distance space between networks A versus B, E and F, where E is the empty network and F is the fully connected one.

doi:10.1371/journal.pone.0089815.g002

- Given a dataset  $D$  with  $s$  samples and  $p$  features, reconstruct (with a chosen algorithm  $\mathcal{A}$ ) the network  $N_D$  on the whole dataset  $D$ ; denote the  $p$  nodes of  $N_D$  by  $x_1^D, \dots, x_p^D$  and its edges' weight by  $a_{hk}^D$ , for  $k, h = 1, \dots, p$ .
- Choose two integers  $n, r$  with  $n < s$  and  $r \leq \binom{s}{n}$ , and build a set  $\mathcal{D}_{(n,r)} = \{D_1, \dots, D_r\}$  where  $D_i$  is a dataset built choosing  $n$  samples from  $D$ .
- Reconstruct, by using the same algorithm  $\mathcal{A}$ , the corresponding networks  $N_{D_i}$  on the subsampled data.
- Compute the NetSI family, where  $\delta$  is an appropriate network distance (e.g.,  $\delta = \text{HIM}$ ):

- Stability:**  $S_\delta(n, r) = \text{mean}(\mathcal{H}_1)$  where  $\mathcal{H}_1 = \{\delta(N_D, N_{D_i}) : i = 1, \dots, r\}$
- Internal Stability:**  $S_\delta^I(n, r) = \text{mean}(\mathcal{H}_2)$  where  $\mathcal{H}_2 = \{\delta(N_{D_i}, N_{D_j}) : i, j = 1, \dots, r, i \neq j\}$
- Edge weight stability:**  $S_w(n, r, h, k) = \frac{\text{range}(E)}{\text{mean}(E)}$  for  $k, h = 1, \dots, p$   
 where  $E = \{a_{hk}^{D_i} : i = 1, \dots, r\}$  and  $\text{range}(E) = |\max(E) - \min(E)|$
- Node degree stability:**  $S_d(n, r, h) = \frac{\text{range}(\Delta)}{\text{mean}(\Delta)}$  for  $h = 1, \dots, p$   
 where  $\Delta = \{\partial(x_h^{D_i}) : i = 1, \dots, r\}$  and  $\text{range}(\Delta) = |\max(\Delta) - \min(\Delta)|$   
 $\partial$  is the degree function (i.e., number of edges connecting the node  $x_h^{D_i}$ ).

- For each set of values of the NetSI family compute the 95% studentized bootstrap confidence intervals
- Compare the statistics of the NetSI family to describe the level of confidence (stability) in the network  $N_D$ , in its links and in its nodes.

**Figure 3. Definition of the NetSI family.**

doi:10.1371/journal.pone.0089815.g003

We propose to tackle the stability issue by quantifying inference variability with respect to data perturbation, and, in particular, data subsampling. If a portion of data is randomly removed before inferring the network, the resulting graph is likely to be different from the one reconstructed from the whole dataset and, in general, different subsets of data would give rise to different networks. Thus, in the spirit of applying reproducibility principles to this

field, one has to accept the compromise that the inferred/non inferred links are just an estimation, lying within a reasonable probability interval. Here we introduce the Network Stability Indicators (NetSI) family, a set of four indicators allowing the researcher to quantitatively evaluate the reproducibility of the reconstruction process. We propose to quantitatively assess, for a given ratio of removed data and for a given amount of (bootstrap

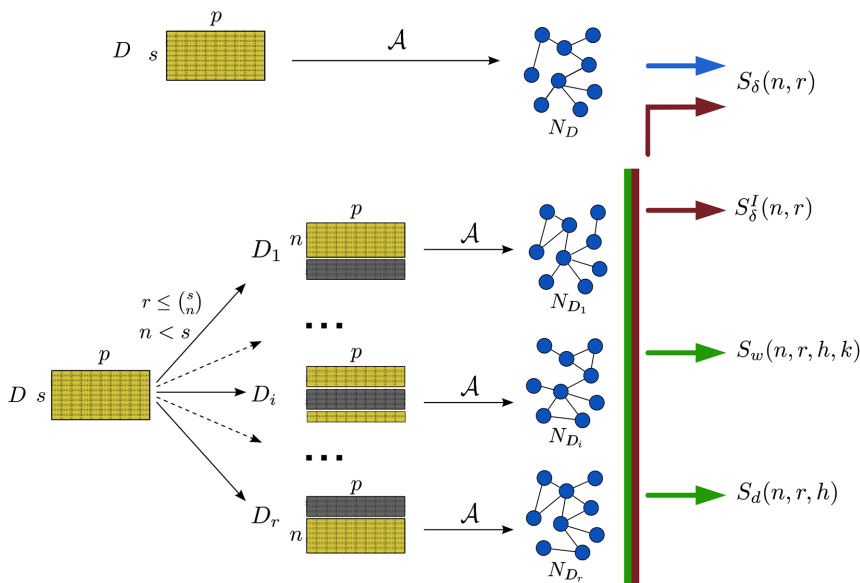

**Figure 4. Graphical description of the pipeline in Fig. 3.** Using the inference algorithm  $\mathcal{A}$ , the network  $N_D$  is first reconstructed from the whole dataset  $D$  with  $s$  samples and  $p$  features (nodes). Given two integers  $n, r$ , a set of  $r$  datasets  $D_i$  is generated by choosing for each  $i$  a subset of  $n$  samples from  $D$ , and the corresponding networks  $N_{D_i}$  are inferred by  $\mathcal{A}$ . Finally, the four indicators  $S_\delta(n, r)$ ,  $S_\delta^I(n, r)$ ,  $S_w(n, r, h, k)$  and  $S_d(n, r, h)$  are computed according to their definition.

doi:10.1371/journal.pone.0089815.g004

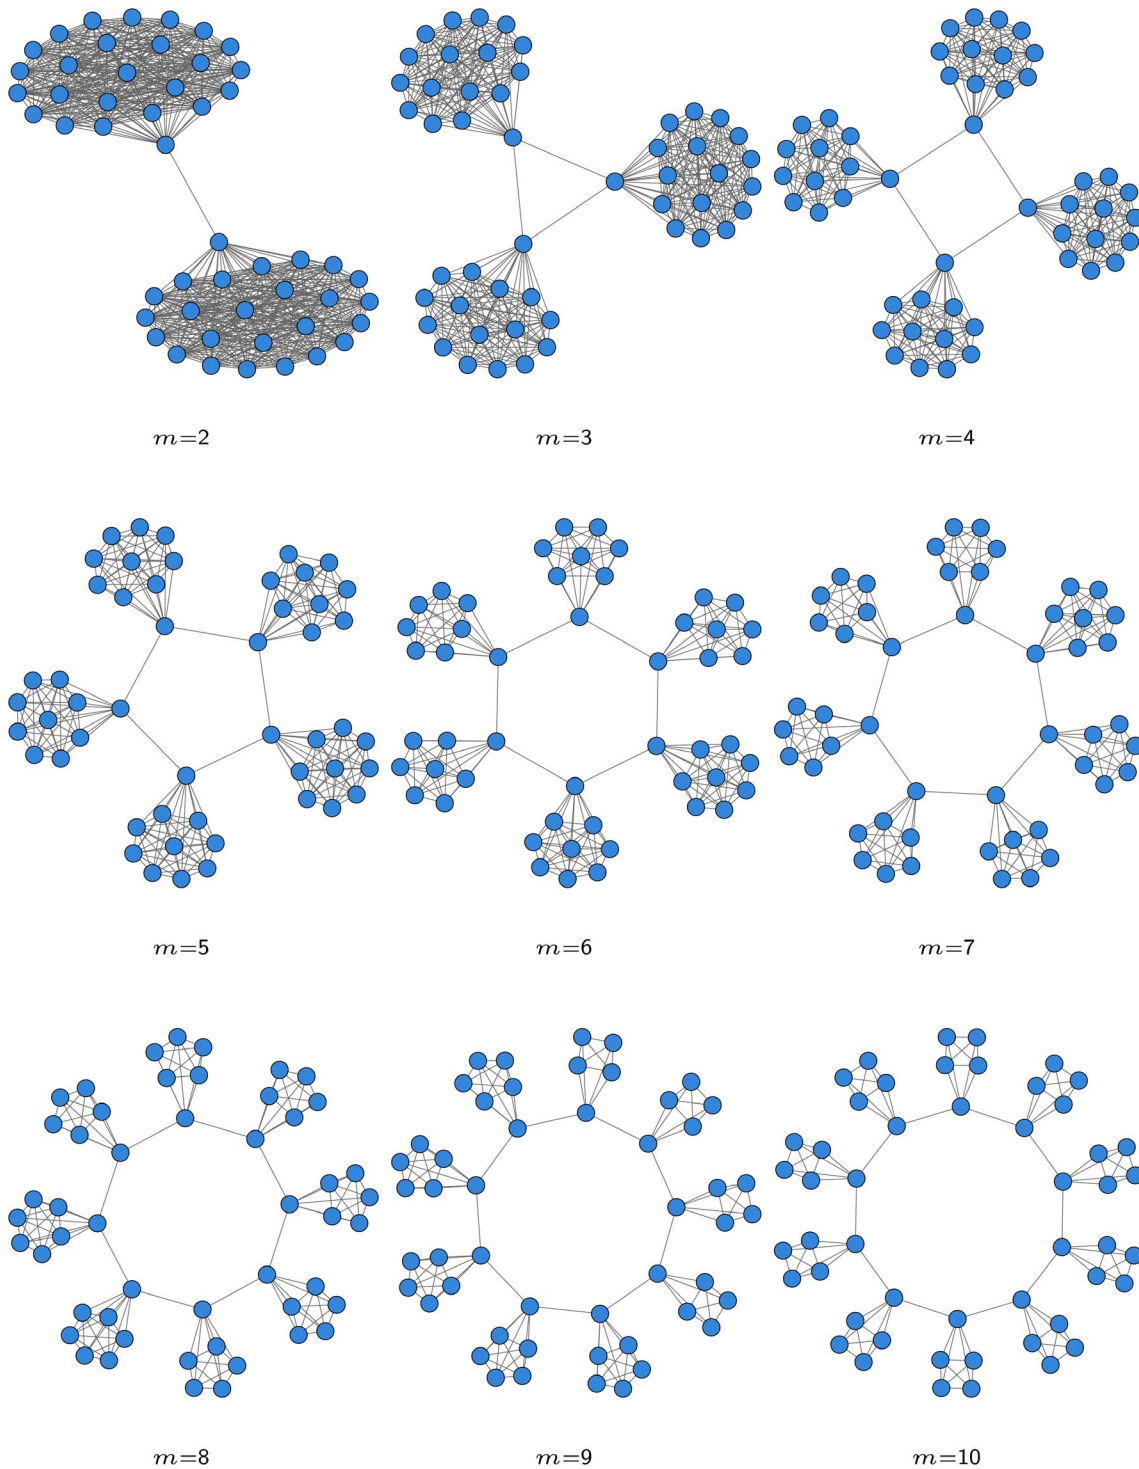

**Figure 5. Synthetic network with  $m$  modules, where  $m$  ranges from 2 to 10 from top left to bottom right.**  
doi:10.1371/journal.pone.0089815.g005

[25] or cross-validation) resampling, the mutual distances among all inferred networks and their distances to the network generated by the whole dataset, with the idea that, the smaller the average distance, the more stable the inferred network. Similarly, we propose two indicators for the distribution of variability of the link weight and node degree across the generated networks, providing a ranked list of the most stable links and nodes, the least variable

being the top ranked. The described framework for evaluating the stability of the whole network obviously relies on a network distance, but it is independent from the chosen metric. As network distance we use the Hamming-Ipsen-Mikhailov (HIM) distance [26], or its components for demonstration purposes, because it represents a good compromise between local (link-based) and global (structure-based) measures of network comparison.

**Table 1.** Modularity and density values for 50-nodes networks ( $G_i$ ) for an increasing number of modules  $m$ .

| $m$ | Modularity | Density |
|-----|------------|---------|
| 1   | 0.00       | 1.00    |
| 2   | 0.50       | 0.49    |
| 3   | 0.66       | 0.32    |
| 4   | 0.73       | 0.24    |
| 5   | 0.78       | 0.19    |
| 6   | 0.80       | 0.16    |
| 7   | 0.81       | 0.13    |
| 8   | 0.82       | 0.11    |
| 9   | 0.81       | 0.10    |
| 10  | 0.81       | 0.09    |

doi:10.1371/journal.pone.0089815.t001

**Table 2.**  $G_m$  networks: range of  $S_\delta$  for different reconstruction algorithms and  $\delta = \{HIM, H, IM\}$ .

| algorithm | $S_\delta$ variation range |               |              |
|-----------|----------------------------|---------------|--------------|
|           | $\delta = HIM$             | $\delta = IM$ | $\delta = H$ |
| WGCNA     | 0.01                       | 0.01          | 0.00         |
| WGCNAFDR  | 0.02                       | 0.03          | 0.00         |
| cor       | 0.02                       | 0.03          | 0.00         |
| MIC       | 0.01                       | 0.02          | 0.00         |
| MICFDR    | 0.04                       | 0.06          | 0.00         |
| ARACNE    | 0.02                       | 0.03          | 0.01         |
| bicor     | 0.02                       | 0.03          | 0.00         |
| TOM       | 0.01                       | 0.01          | 0.00         |
| CLR       | 0.03                       | 0.05          | 0.01         |

doi:10.1371/journal.pone.0089815.t002

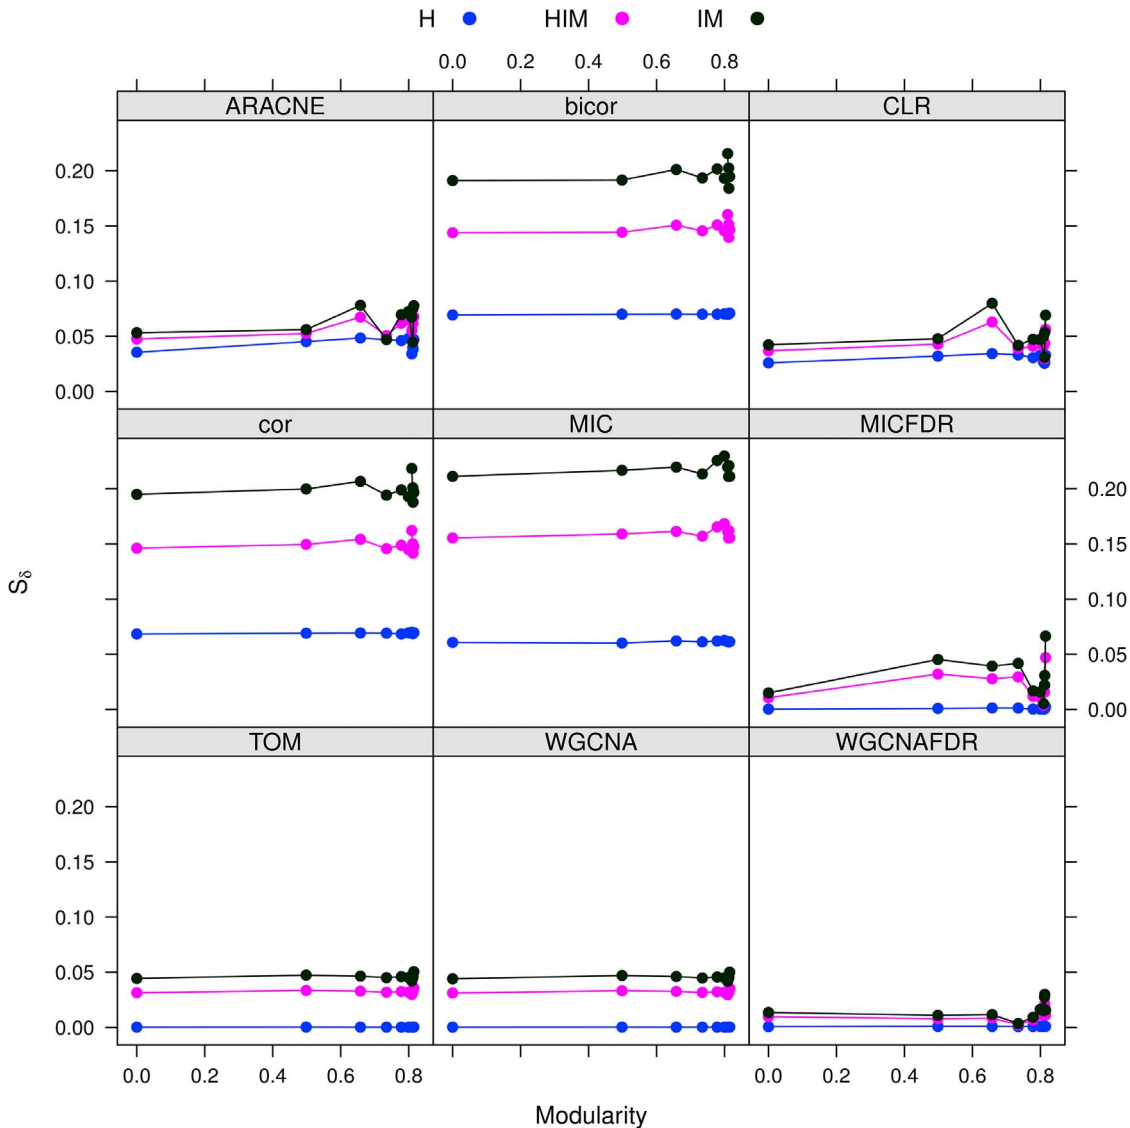

**Figure 6.**  $G_m$  networks: Stability of synthetic networks for different modularity levels.

doi:10.1371/journal.pone.0089815.g006

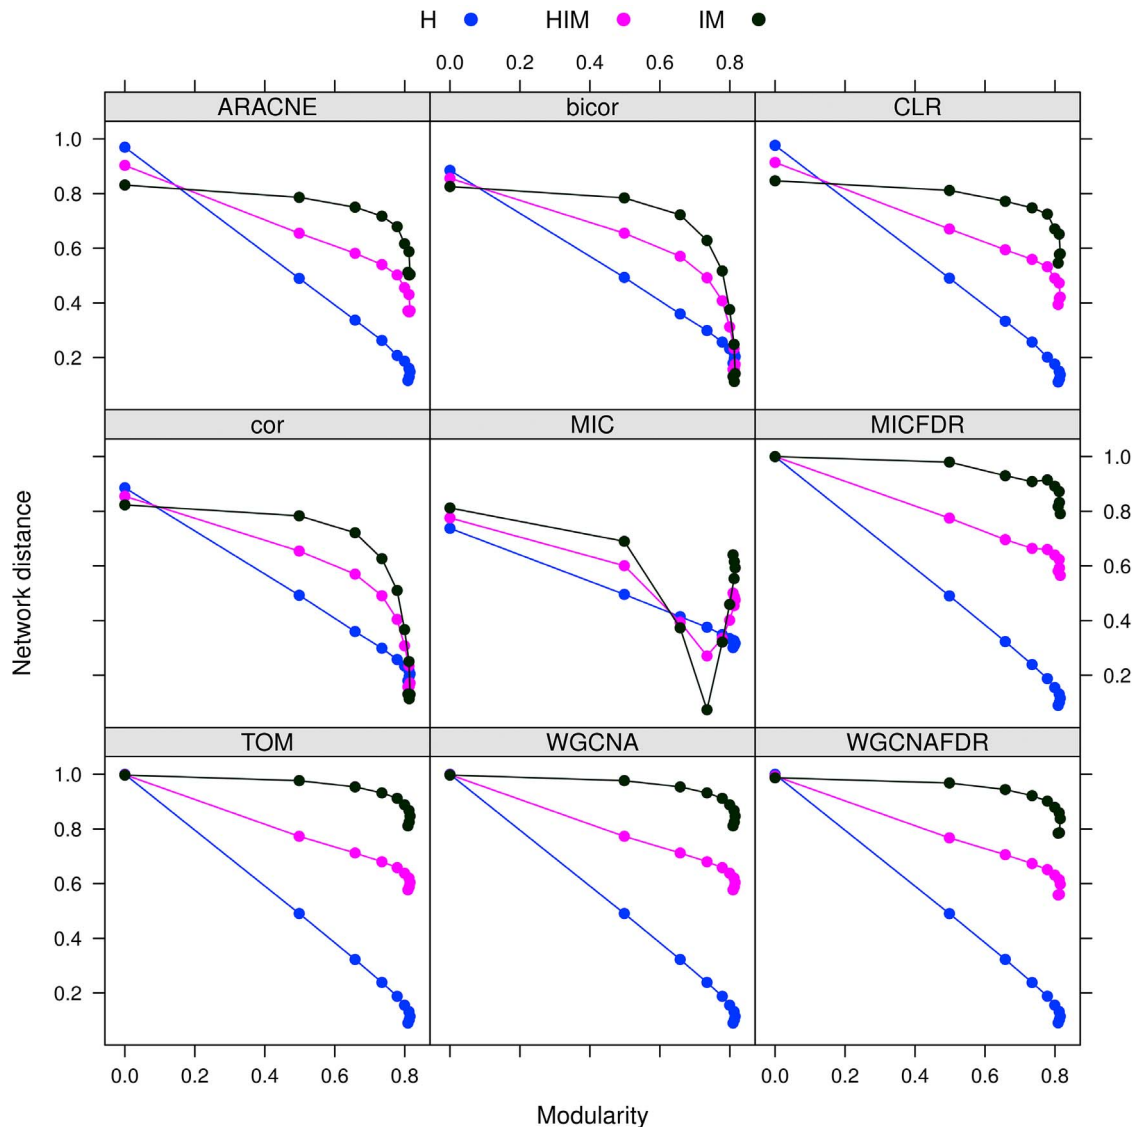

**Figure 7.  $G_m$  networks: distance between gold standard (HIM) and inferred synthetic networks for different modularity levels.**  
doi:10.1371/journal.pone.0089815.g007

Moreover, the HIM distance can be easily included in pipelines for network analysis [27].

We first show the effect of network modularity and the dataset sample size on both the stability and the accuracy of the network inference process. For this purpose, we create two synthetic datasets with a known gold standard. The results are demonstrated for several inference algorithm, such as the Algorithm for the Reconstruction of Accurate Cellular Networks (ARACNE), developed for the reconstruction of gene regulatory networks [28], the Context Likelihood of Relatedness (CLR) approach [29] and the Weighted Gene Correlation Network Analysis (WGCNA) [30]. Then the NetSI indicators are computed on correlation networks developed on another *ad hoc* synthetic dataset. We highlight the difference in terms of stability due to the choice of the inference algorithm: two basic correlation measures and the impact of a permutation-based False Discovery Rate (FDR) filter. Finally, we show the use of NetSI measures in a typical application, comparing the stability of relevance networks inferred on a miRNA microarray dataset with paired tissues extracted from

a cohort of 241 hepatocellular carcinoma patients [31,32]. The data exhibit two phenotypes, one related to disease (tumoral or non-tumoral tissues) and one to patient gender (male or female); we show that four different networks are obtained, each of different stability, and that the reconstruction method is a serious source of variability with the smaller data subgroups. Finally we validate the analysis on a second hepatocellular carcinoma dataset (166 subjects) with good reproducibility.

All the methods (HIM distance and NetSI indicators) have been implemented in the open source R package *nettools* for the CRAN archives, as well as on GitHub at the address <https://github.com/MPBA/nettools.git>. For computing efficiency, the software can be used on multicore workstations and on high performance computing (HPC) clusters. Further technical details and preliminary experiments with *nettools* are available in [33].

## Methods

Before defining the NetSI family we briefly summarize the main definitions and properties of the HIM network distance.

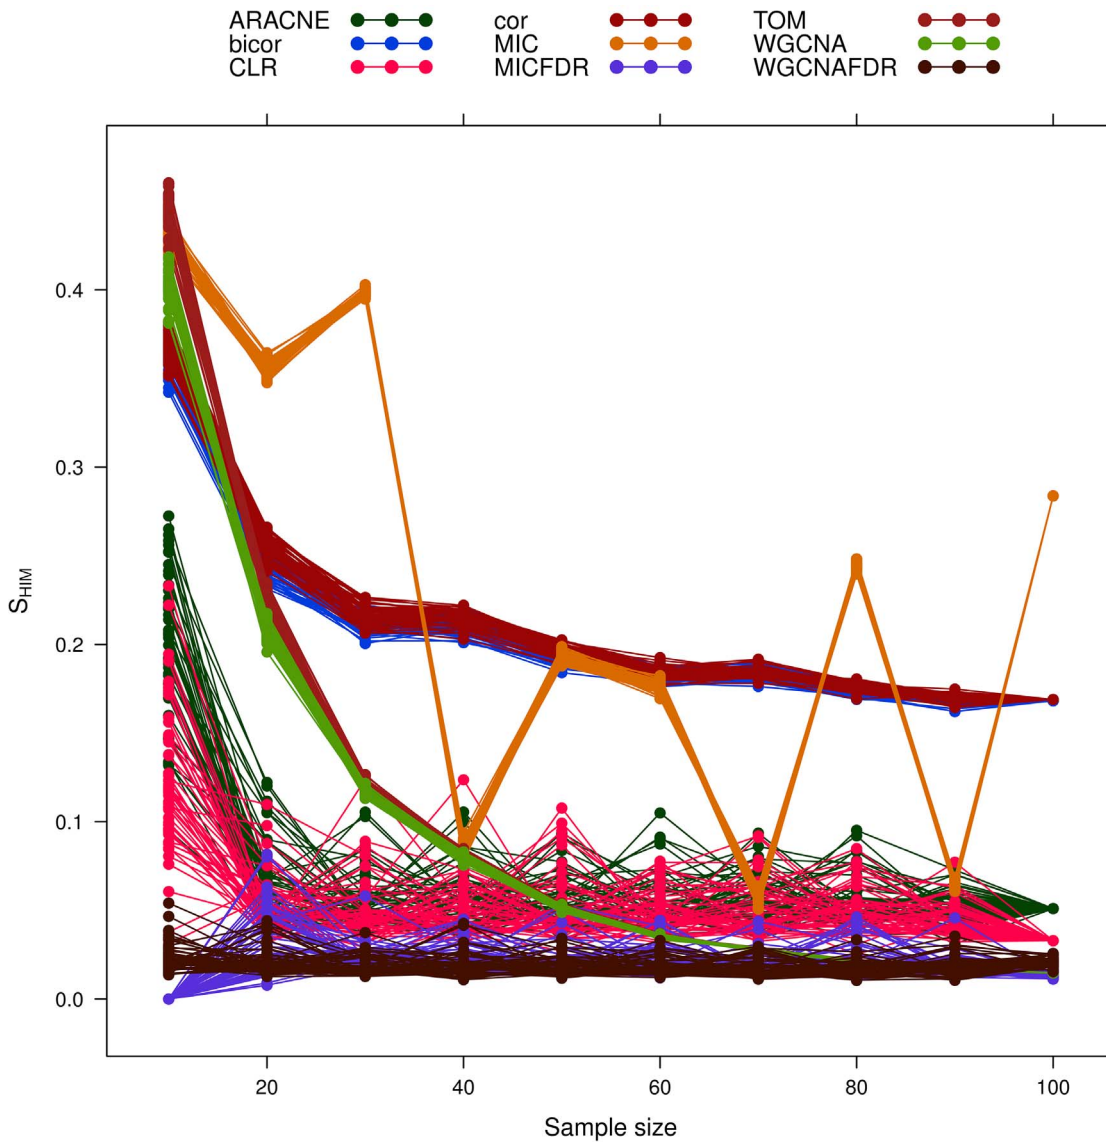

**Figure 8. Yeast-like simulated data: effect of increasing sample size on network reconstruction stability  $S_{HIM}$ .** Different network inference algorithms are compared. doi:10.1371/journal.pone.0089815.g008

Moreover, at the end of this section, we provide a short description of the network inference approaches used in the following experiments.

**HIM network distance**

The HIM distance [26] is a metric for network comparison combining an edit distance (Hamming [34,35]) and a spectral one (Ipsen-Mikhailov [36]). As discussed in [37], edit distances are local, *i.e.* they focus only on the portions of the network interested by the differences in the presence/absence of matching links. Spectral distances evaluate instead the global structure of the compared topologies, but they cannot distinguish isomorphic or isospectral graphs, which can correspond to quite different conditions within the biological context. Their combination into the HIM distance represents an effective solution to the quantitative evaluation of network differences.

Let  $\mathcal{N}_1$  and  $\mathcal{N}_2$  be two simple networks on  $N$  nodes, described by the corresponding adjacency matrices  $A^{(1)}$  and  $A^{(2)}$ , with  $a_{ij}^{(1)}, a_{ij}^{(2)} \in \mathbb{F}$ , where  $\mathbb{F} = \mathbb{F}_2 = \{0,1\}$  for unweighted graphs and  $\mathbb{F} = [0,1]$  for weighted networks. Denote then by  $\mathbb{I}_N$  the identity

$$N \times N \text{ matrix } \mathbb{I}_N = \begin{pmatrix} 1 & 0 & \dots & 0 \\ 0 & 1 & \dots & 0 \\ & & \dots & \\ 0 & 0 & \dots & 1 \end{pmatrix}, \text{ by } \mathbb{K}_N \text{ the unitary } N \times N$$

matrix with all entries equal to one and by  $\mathbb{J}_N$  the null  $N \times N$  matrix with all entries equal to zero. Finally, denote by  $\mathcal{E}_N$  the empty network with  $N$  nodes and no links (with adjacency matrix  $\mathbb{J}_N$ ) and by  $\mathcal{F}_N$  the undirected full network with  $N$  nodes and all possible  $N(N-1)$  links (whose adjacency matrix is  $\mathbb{K}_N - \mathbb{I}_N$ ).

The definition of the Hamming distance is the following:

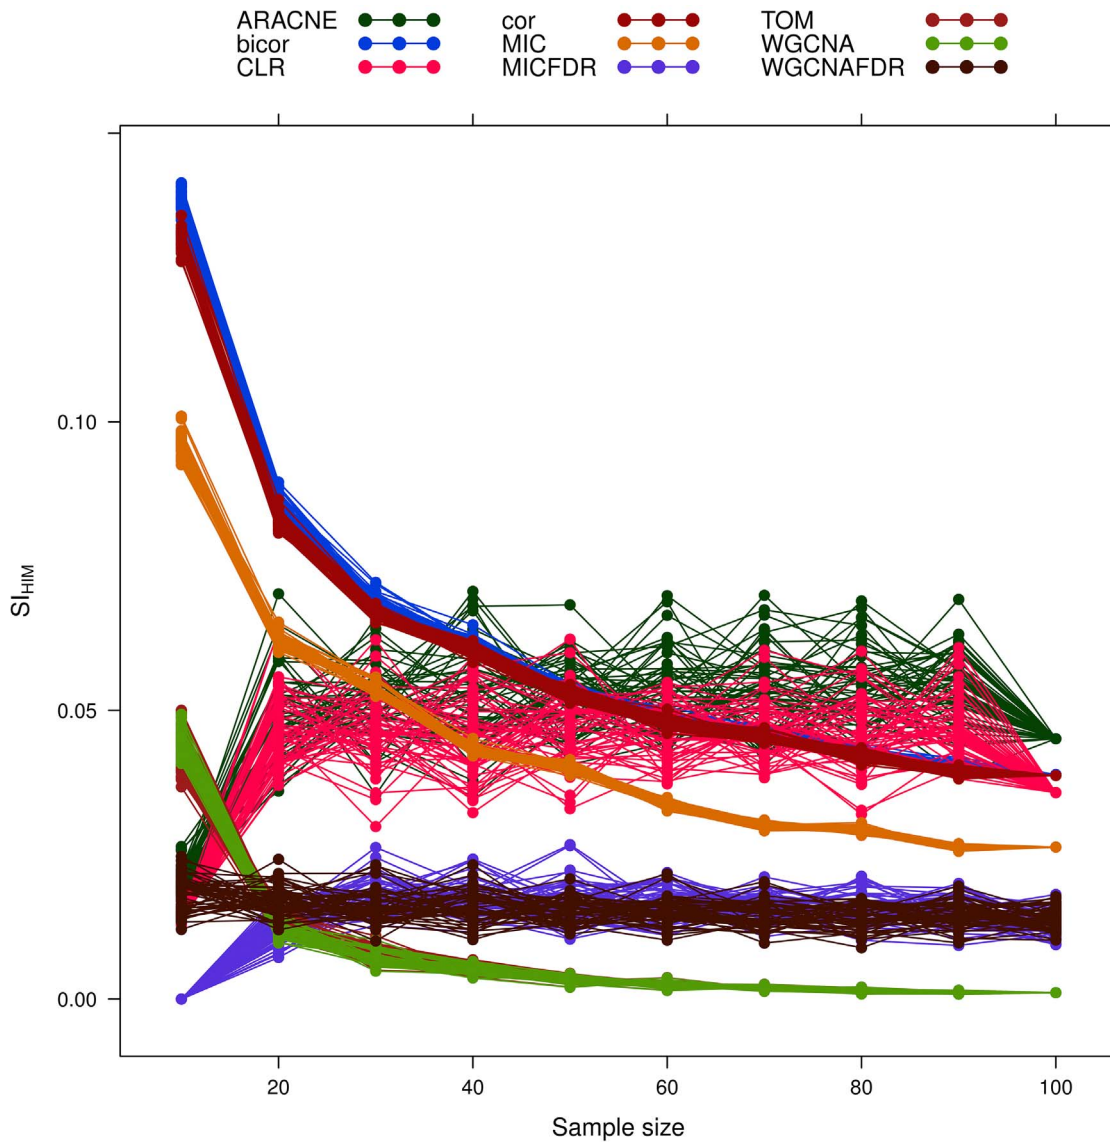

**Figure 9. Yeast-like simulated data: effect of increasing sample size on network reconstruction internal stability  $S_{HIM}^I$ .** Different network inference algorithms are compared. doi:10.1371/journal.pone.0089815.g009

$$\text{Hamming}(\mathcal{N}_1, \mathcal{N}_2) = \sum_{1 \leq i \neq j \leq N} |A_{ij}^{(1)} - A_{ij}^{(2)}|.$$

To guarantee independence from the network dimension (number of nodes), we normalize the above function by the factor  $\bar{n} = \text{Hamming}(\mathcal{E}_N, \mathcal{F}_N) = N(N-1)$ :

$$H(\mathcal{N}_1, \mathcal{N}_2) = \frac{1}{N(N-1)} \sum_{1 \leq i \neq j \leq N} |A_{ij}^{(1)} - A_{ij}^{(2)}|. \quad (1)$$

When  $\mathcal{N}_1$  and  $\mathcal{N}_2$  are unweighted networks,  $H(\mathcal{N}_1, \mathcal{N}_2)$  is just the fraction of different matching links (over the total number

$N(N-1)$  of possible links) between the two graphs. In all cases,  $H(\mathcal{N}_1, \mathcal{N}_2) \in [0, 1]$ , where the lower bound 0 is attained only for identical networks  $A^{(1)} = A^{(2)}$  and the upper bound 1 is reached whenever the two networks are complementary

$$A^{(1)} + A^{(2)} = \mathbb{I}_N - \mathbb{I}_N = \begin{pmatrix} 0 & 1 & \dots & 1 \\ 1 & 0 & \dots & 1 \\ \dots & \dots & \dots & \dots \\ 1 & 1 & \dots & 0 \end{pmatrix}.$$

Among spectral distances, we consider the Ipsen-Mikhailov distance IM which has been proven to be the most robust in a wide range of situations [37,38]. Originally introduced in [36] as a tool for network reconstruction from its Laplacian spectrum, the definition of the Ipsen-Mikhailov metric follows the dynamical interpretation of a  $N$ -nodes network as a  $N$ -atoms molecule connected by identical elastic strings, where the pattern of connections is defined by the adjacency matrix of the corresponding network. In particular the connections between nodes in the



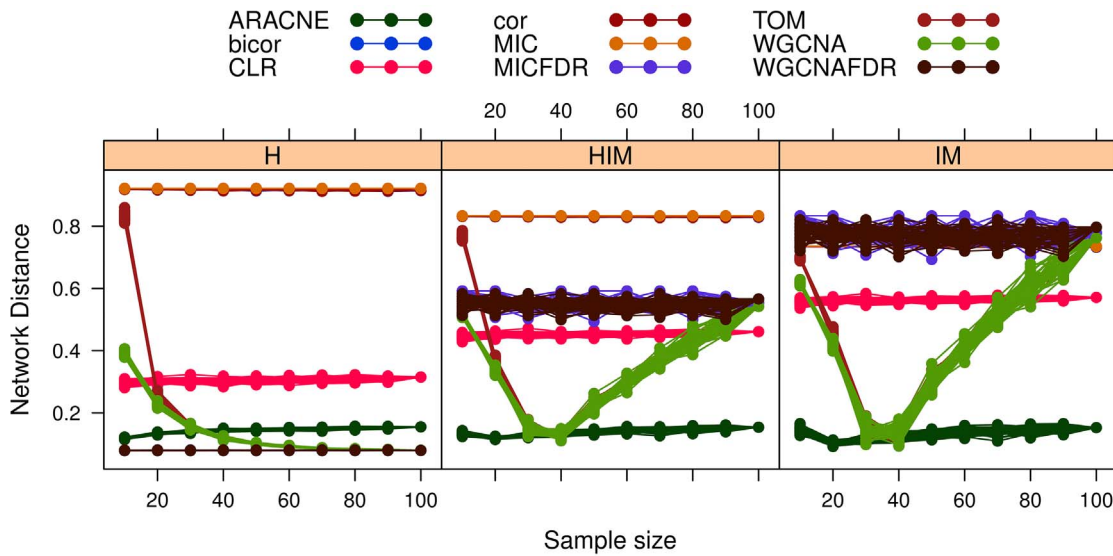

**Figure 10. Yeast-like simulated data: effect of increasing sample size on network reconstruction accuracy measured as HIM distance and its components Hamming (H) and Ipsen-Mikhailov (IM) with respect to the gold standard.** Different network inference algorithms are compared.

doi:10.1371/journal.pone.0089815.g010

network correspond to the bonds between atoms in the dynamical system and the adjacency matrix is its topological description.

We summarize here the mathematical details of the IM definition [36]. The dynamical properties of the oscillatory system are described by the set of  $N$  differential equations

$$\ddot{x}_i + \sum_{j=1}^N A_{ij}(x_i - x_j) = 0 \quad \text{for } i = 0, \dots, N-1, \quad (2)$$

where  $x_i$  are the coordinates of the physical molecules. Since the adjacency matrix  $A$  depends on the node labeling, we consider instead the Laplacian matrix  $L$ , which for an undirected network is defined as the difference between the degree matrix  $D$  (the diagonal matrix with vertex degrees as entries) and  $A$ :  $L = D - A$ .  $L$  is positive semidefinite and singular [39–42], and its set of eigenvalues  $0 = \lambda_0 \leq \lambda_1 \leq \dots \leq \lambda_{N-1}$ , *i.e.* the spectra of the associated graph, provide the natural vibrational frequencies  $\omega_i$  for the system modeled in Eq. 2:  $\lambda_i = \omega_i^2$ , with  $\lambda_0 = \omega_0 = 0$ . The spectral density  $\rho$  for a graph can be written as the sum of Lorentz

distributions

$$\rho(\omega, \gamma) = K \sum_{i=1}^{N-1} \frac{\gamma}{(\omega - \omega_i)^2 + \gamma^2},$$

where  $\gamma$  is the common width and  $K$  is the normalization constant defined as

$$K = \frac{1}{\gamma \sum_{i=1}^{N-1} \int_0^\infty \frac{d\omega}{(\omega - \omega_i)^2 + \gamma^2}},$$

so that  $\int_0^\infty \rho(\omega, \gamma) d\omega = 1$ . The scale parameter  $\gamma$  specifies the half-width at half-maximum, which is equal to half the inter-quartile range. From the above definitions, the spectral distance  $\gamma$

1. Let  $D$  be a dataset with  $m$  samples described by  $p$  features, and let  $C(h, k) = |\text{cor}(x_h, x_k)|$  where  $x_j$  is the  $j$ -th feature of  $D$  across the  $m$  samples and  $\text{cor}$  is a correlation measure.
2. Build the standard correlation network  $N_D$  using the rule  $a_{hk} = C(h, k)$
3. Build the FDR controlled (at  $p$ -value  $\varphi = 10^{-z}$ ) correlation network  $M_D^z$  using the rule

$$a_{hk} = \begin{cases} C(h, k) & \text{if } |F_D^z(h, k)| \leq 1 \\ 0 & \text{otherwise,} \end{cases}$$

where the set  $F_D^z(h, k)$  is defined as follows

$$F_D^z(h, k) = \{|\text{cor}(\sigma_i(x_h), \tau_i(x_k))| \geq C(h, k) : \sigma_i, \tau_i \in S_m, i = 1, \dots, \max\{10^z, m! - 1\}\},$$

for distinct non trivial  $\sigma_i \tau_i^{-1}$ , where  $S_m$  is the permutation group on  $m$  elements.

**Figure 11. Construction of an FDR-corrected correlation network.**

doi:10.1371/journal.pone.0089815.g011

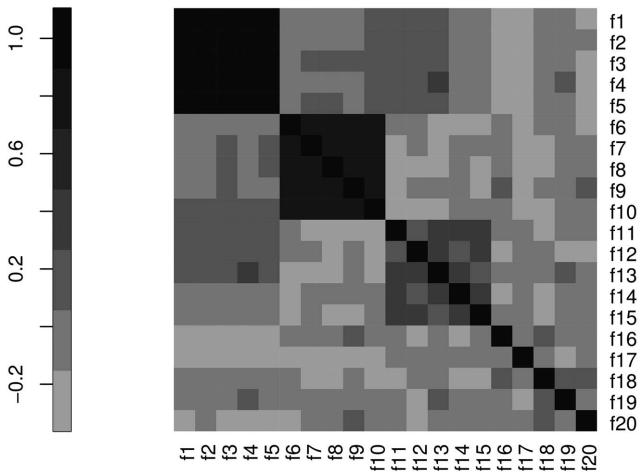

**Figure 12. The correlation matrix  $M_T$  used to generate the synthetic dataset  $T$ .**  
doi:10.1371/journal.pone.0089815.g012

between two graphs  $G$  and  $H$  with densities  $\rho_G(\omega, \gamma)$  and  $\rho_H(\omega, \gamma)$  can then be defined as

$$\epsilon_\gamma(G, H) = \sqrt{\int_0^\infty [\rho_G(\omega, \gamma) - \rho_H(\omega, \gamma)]^2 d\omega}$$

The highest value of  $\epsilon_\gamma$  is reached, for a given number of nodes  $N$ , when evaluating the distance between  $\mathcal{E}_N$  and  $\mathcal{F}_N$ . Defining  $\bar{\gamma}$  as the (unique [26]) solution of

$$\epsilon_\gamma(\mathcal{E}_N, \mathcal{F}_N) = 1$$

we can now define the normalized Ipsen-Mikahilov distance IM as

$$\text{IM}(G, H) = \epsilon_{\bar{\gamma}}(G, H) = \sqrt{\int_0^\infty [\rho_G(\omega, \bar{\gamma}) - \rho_H(\omega, \bar{\gamma})]^2 d\omega}$$

so that  $\text{IM}(G, H) \in [0, 1]$  with the upper bound attained only for  $(G, H) = (\mathcal{E}_N, \mathcal{F}_N)$ .

Finally, the generalized HIM distance is defined by the one-parameter family of product metrics linearly combining with a factor  $\xi \in [0, +\infty)$  the normalized Hamming distance H and the normalized Ipsen-Mikahilov IM distance, further normalized by the factor  $\sqrt{1 + \xi}$  to set its upper bound to 1:

$$\text{HIM}_\xi(N_1, N_2) = \frac{1}{\sqrt{1 + \xi}} \sqrt{\text{H}(N_1, N_2)^2 + \xi \cdot \text{IM}(N_1, N_2)^2}$$

Obviously,  $\text{HIM}_0 = \text{H}$  and  $\lim_{\xi \rightarrow +\infty} \text{HIM}_\xi = \text{IM}$ . For example, the flexibility introduced by  $\xi$  can be used to focus attention more on structure than on local editing changes when  $\text{HIM}_\xi$  is used to

generate a kernel function for classification tasks (e.g. on brain networks).

In what follows we will mostly deal with the case  $\xi = 1$ , and omit the subscript  $\xi$  for brevity. The relative effect of the two components is exemplified in Fig. 1A-D. The three small size networks (5 nodes)  $N_A, N_B$ , and  $N_C$  in Fig. 1A differ from each other in only two edges but  $N_A$  and  $N_C$  are isomorphic and diverse from  $N_B$ , as correctly picked up by the HIM distance (see table in Fig. 1C). Similarly, HIM, H and IM provide different values when four edges are cut from on the larger (50 nodes)  $G_4$  network, at different levels of the graph structure. Larger effects are caused by the elimination of the four red edges connecting the four submodules with differences up to 10 times larger for IM with respect to H (see table in Fig. 1D).

The HIM distance can be represented in the  $[0, 1] \times [0, 1]$  Hamming/Ipsen-Mikhailov space, where a point  $P(x, y)$  represents the distance between two networks  $N_1$  and  $N_2$  whose coordinates are  $x = \text{H}(N_1, N_2)$  and  $y = \text{IM}(N_1, N_2)$  and the norm of  $P$  is  $\sqrt{1 + \xi}$  times the HIM distance  $\text{HIM}(N_1, N_2)$ . The same holds for weighted networks, provided that the weights range over  $[0, 1]$ . In Fig. 2 we provide an example of this representation by evaluating the HIM distance between networks of four nodes, namely networks A, B, E (empty) and F (full) in the left panel of Fig. 2. If the Hamming/Ipsen-Mikhailov space is roughly split into four quadrants I, II, III, and IV, then two networks whose distance is mapped in quadrant I are close both in terms of matching links and of structure, while those falling in quadrant III differ with respect to both characteristics. Networks corresponding to a point in quadrant II have many common links, but different structures, while a point in quadrant IV indicates two networks with few common links, but with similar structure.

Full mathematical details about the HIM distance and its two components H and IM can be found in [26].

### The Network Stability Indicators (NetSI)

The mathematical and operational definition of the four NetSI indicators are introduced in Fig. 3. The first two are the stability indicators  $S_\delta$  and the internal stability indicator  $S_\delta^I$ , which concern the stability of the whole reconstructed network. The former measures the distances between the network inferred on the whole dataset against the networks inferred from the resampled subsets. The latter measures all the mutual distances within the networks inferred from the resampled subsets. The other two indicators, the edge weight stability indicator  $S_w$  and the node degree stability indicator  $S_d$ , concern instead the stability of the single links and nodes, in terms of mutual variability of their respective weight and degree. In all cases, smaller indicator values correspond to more stable objects.

We adopt  $\delta = \text{HIM}$ , except for the first experiment where we show also the stability for  $\delta = \text{H}$  and  $\delta = \text{IM}$ . As the HIM distance is defined also on directed networks, the extension of the NetSI family to the directed case is straightforward. A graphical representation of the procedure is provided in Fig. 4. For all experiments reported in this paper, we used  $n = s - 1$ ,  $r = 1$  (leave-one-out stability, LOO for short), and 20 different instances of  $k$ -fold cross validation (discarding the test portion) for  $k = 2, 4, 10$  ( $k_2$ ,  $k_4$  and  $k_{10}$ ), and thus  $n = \frac{s(k-1)}{k}$  and  $r = 20k$ .

### Stability of network inference algorithms

As a first application, we test the difference in stability of the reconstruction process for a set of alternative network co-expression inference algorithms.

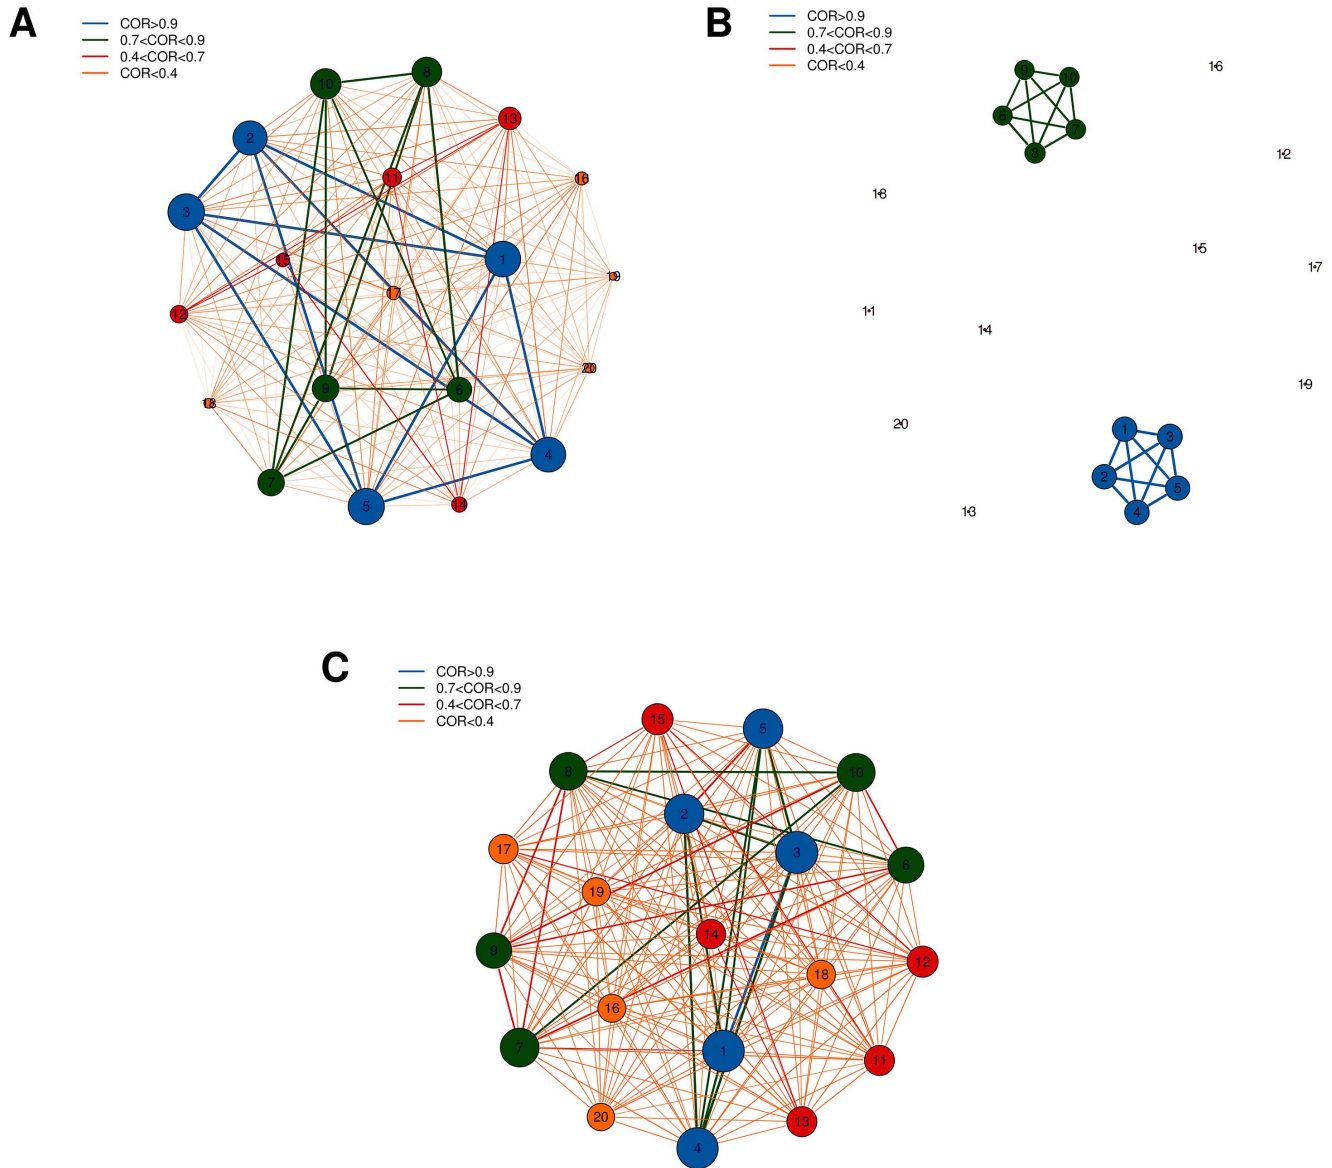

**Figure 13. Synthetic dataset  $T$ : correlation networks inferred by using (A) WGCNA [W], (B) (absolute) Pearson with FDR correction at  $p$ -value  $10^{-4}$  [C( $10^{-4}$ )] and (C) MIC [M].** Node label  $i$  corresponds to feature  $f_i$ , node size is proportional to node degree and link colors identify different classes of link weights.

doi:10.1371/journal.pone.0089815.g013

The most famous representative of the correlation-based approaches is surely the Weighted Gene Correlation Network Analysis (WGCNA) [30,43]. In this case the co-expression similarity is defined as a function of the absolute correlation. We adopt as similarity score: (i) the simple absolute Pearson correlation (labelled as “cor”), (ii) a more sophisticated version with soft-thresholding, *i.e.*, the similarity is defined as a power of the absolute correlation (we adopt the default value six as in the *WGCNA* R package), or (iii) the biweight midcorrelation (“bicor” for short) [30,44], which is more robust to outliers than the Pearson correlation, and (iv) the Maximal Information Coefficient (labeled as MIC). MIC is a recent association measure based on mutual information and belongs to the Maximal Information-based Nonparametric Exploration (MINE) statistics [44–48]. In all cases we obtain a weighted network with link strength ranging from 0 to 1.

The Topological Overlap Measure (TOM) replaces the original co-expression similarity with a measure of interconnectedness

(between pairs of nodes) based on shared neighbors [30,43]. TOM can be seen as a filter for cutting away weak connections, thus leading to more robust networks than WGCNA.

The Context Likelihood of Relatedness (CLR) approach [29] scores the interactions by using the mutual information between the corresponding gene expression levels, coupled with an adaptive background correction step. Although suboptimal if the number of nodes is much larger than the number of variables, it was observed that CLR performs well in terms of prediction accuracy and some CLR predictions in literature were recently validated experimentally [49].

The Algorithm for the Reconstruction of Accurate Cellular Networks (ARACNE) is another approach relying on mutual information, which was originally developed for inferring regulatory networks of mammalian cells [28]. It starts with a graph where each pair of nodes are connected if their association is above a chosen threshold. In order to avoid the false positive problem,

**Table 3.** Synthetic dataset  $T$ : stability ( $S_{\text{HIM}}$  and  $S'_{\text{HIM}}$ ) on networks inferred by MIC, WGCNA, and CORFDR( $\rho$ ).

| $\mathcal{A}$               | $k$      | $S_{\text{HIM}}$ | CI (min; max)  | Range (min; max) | $S'_{\text{HIM}}$ | CI (min; max)  | Range (min; max) |
|-----------------------------|----------|------------------|----------------|------------------|-------------------|----------------|------------------|
| MIC                         | LOO      | 0.008            | (0.007; 0.008) | (0.004; 0.011)   | 0.008             | (0.008; 0.008) | (0.003; 0.014)   |
| MIC                         | $k_{10}$ | 0.052            | (0.051; 0.052) | (0.041; 0.067)   | 0.021             | (0.021; 0.021) | (0.014; 0.036)   |
| MIC                         | $k_4$    | 0.055            | (0.054; 0.057) | (0.040; 0.071)   | 0.031             | (0.031; 0.031) | (0.022; 0.045)   |
| MIC                         | $k_2$    | 0.139            | (0.134; 0.142) | (0.112; 0.158)   | 0.047             | (0.047; 0.048) | (0.035; 0.067)   |
| WGCNA                       | LOO      | 0.005            | (0.005; 0.006) | (0.001; 0.015)   | 0.008             | (0.008; 0.008) | (0.002; 0.023)   |
| WGCNA                       | $k_{10}$ | 0.021            | (0.020; 0.022) | (0.011; 0.040)   | 0.028             | (0.028; 0.028) | (0.012; 0.064)   |
| WGCNA                       | $k_4$    | 0.039            | (0.037; 0.041) | (0.020; 0.062)   | 0.046             | (0.046; 0.047) | (0.025; 0.088)   |
| WGCNA                       | $k_2$    | 0.070            | (0.065; 0.076) | (0.037; 0.108)   | 0.070             | (0.069; 0.071) | (0.042; 0.117)   |
| CORFDR( $10^{-2}$ )         | LOO      | 0.015            | (0.013; 0.016) | (0.005; 0.035)   | 0.017             | (0.017; 0.017) | (0.001; 0.047)   |
| CORFDR( $10^{-2}$ )         | $k_{10}$ | 0.023            | (0.022; 0.025) | (0.007; 0.074)   | 0.028             | (0.027; 0.028) | (0.002; 0.102)   |
| CORFDR( $10^{-2}$ )         | $k_4$    | 0.031            | (0.028; 0.034) | (0.010; 0.069)   | 0.034             | (0.034; 0.035) | (0.006; 0.096)   |
| CORFDR( $10^{-2}$ )         | $k_2$    | 0.045            | (0.039; 0.054) | (0.014; 0.107)   | 0.050             | (0.048; 0.051) | (0.006; 0.152)   |
| CORFDR( $5 \cdot 10^{-3}$ ) | LOO      | 0.029            | (0.028; 0.031) | (0.003; 0.048)   | 0.018             | (0.018; 0.018) | (0.000; 0.054)   |
| CORFDR( $5 \cdot 10^{-3}$ ) | $k_{10}$ | 0.025            | (0.024; 0.027) | (0.004; 0.054)   | 0.024             | (0.024; 0.024) | (0.001; 0.083)   |
| CORFDR( $5 \cdot 10^{-3}$ ) | $k_4$    | 0.025            | (0.023; 0.028) | (0.006; 0.056)   | 0.032             | (0.032; 0.033) | (0.004; 0.099)   |
| CORFDR( $5 \cdot 10^{-3}$ ) | $k_2$    | 0.033            | (0.028; 0.038) | (0.008; 0.070)   | 0.044             | (0.042; 0.045) | (0.002; 0.121)   |
| CORFDR( $10^{-4}$ )         | LOO      | 0.010            | (0.008; 0.013) | (0.000; 0.044)   | 0.013             | (0.013; 0.014) | (0.000; 0.045)   |
| CORFDR( $10^{-4}$ )         | $k_{10}$ | 0.010            | (0.009; 0.012) | (0.000; 0.053)   | 0.014             | (0.014; 0.015) | (0.000; 0.055)   |
| CORFDR( $10^{-4}$ )         | $k_4$    | 0.009            | (0.007; 0.012) | (0.001; 0.049)   | 0.014             | (0.014; 0.014) | (0.001; 0.054)   |
| CORFDR( $10^{-4}$ )         | $k_2$    | 0.009            | (0.007; 0.013) | (0.001; 0.031)   | 0.014             | (0.013; 0.015) | (0.001; 0.040)   |

Indicators  $S_{\text{HIM}}$  and  $S'_{\text{HIM}}$ , 95% Student bootstrap confidence intervals and range for different instances of the MIC, WGCNA and CORFDR( $\rho$ ) networks for different values of data subsampling.

doi:10.1371/journal.pone.0089815.t003

that usually affects co-expression networks, we then apply the Data Processing Inequality (DPI) procedure for removing the weakest edge of each triplet, thus pruning the majority of undirected links.

A unique interface to all the mentioned algorithms is integrated in the stability analysis tools in the *nettools* package, based on their Bioconductor and CRAN implementations: *minet* for ARACNE and CLR, *WGCNA* for WGCNA, TOM and bicor, and *minerva* for MIC.

## Results and Discussion

### Stability is modularity invariant

We demonstrate the invariance of the NetSI family with respect to network modularity in a controlled situation. We show that the proposed stability evaluation framework is not affected by various network structures for nine reconstruction algorithms. Moreover, we demonstrate that this property is maintained both if we adopt the HIM metric for the  $S_\delta$  indicator computation and we use the two components H and IM separately.

**Data generation.** We created a set of networks  $G_m$  with 50 nodes each with  $m$  (where  $m$  ranges from 1 to 10) fully connected subgroups, which are linked to each other with a single edge. For  $m=1$  we obtain a fully connected network (without loops), while the resulting networks for  $m>1$  are displayed in Fig. 5. For each network  $G_m$  we report its modularity value and density in Tab. 1.

The simulated gene expression values corresponding to the networks  $G_m$  are generated loading the corresponding adjacency matrices in the Gene Net Weaver (GNW) simulator [50]. Specifically, the tool is used to create of simulated transcription datasets after a random initialization of each network's regulatory

dynamics through a pre-loaded kinetic model [23]. Moreover it is possible to generate a steady-state dataset or a set of time series, which describes the network response to a perturbation, followed by perturbation removal until the steady state is reached. Thus, we chose to generate in one shot 50 time-series (one for each sample) with default parameter settings and to consider only the initial time point, since  $t=0$  corresponds to the wild-type steady state. Summarizing, we generated 10 synthetic datasets having a simulated expression level for 50 “genes” and 50 “samples”.

**Results.** We inferred networks from the 10 datasets with nine algorithms: ARACNE, CLR, cor, TOM, bicor, WGCNA and MIC, where the last two were also used with a permutation-based FDR filter (for details, see Subsection “FDR control effect on correlation networks”).

The stability analysis with three possible network metrics (HIM, H and IM) on networks inferred with the nine mentioned approaches is reported in Fig. 6. In all cases, the stability  $S_\delta$  varies less than 0.06 across different modularity values, as detailed in Tab. 2. Hence, the stability indicator is not affected by different modular structures. However, reconstruction accuracy depends on modularity (or density), as shown by a comparison with the gold standard (Fig. 7), in which a lower distance from the gold standard is found for sparser networks for all methods.

### Inference on synthetic yeast-like networks

We investigated the behavior of the NetSI stability indicators for different sample sizes on a yeast-like dataset, again simulated by GNW.

**Data Description.** We considered a subnetwork of the Yeast transcriptional regulatory network available in GNW, namely the

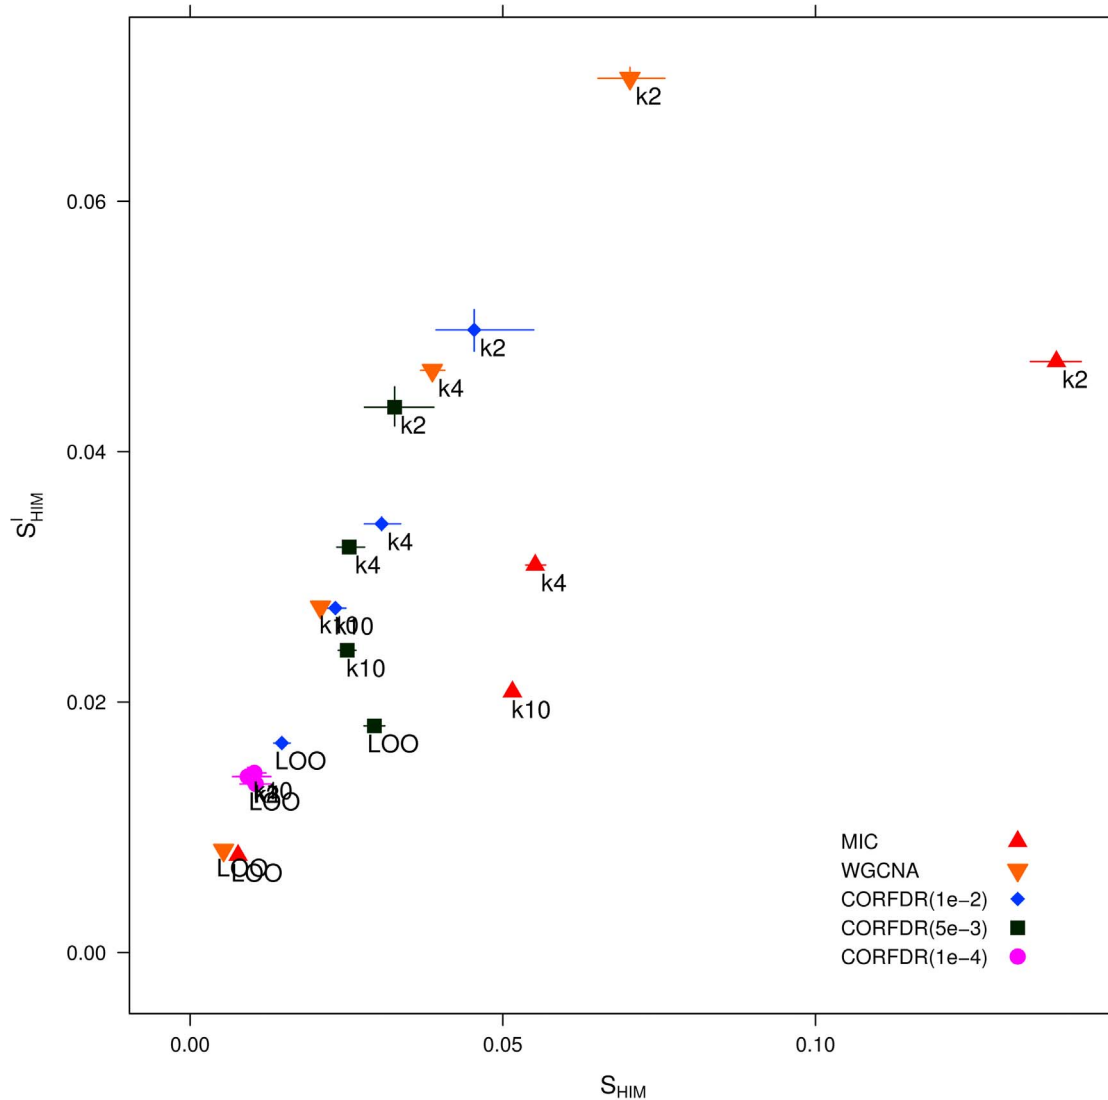

**Figure 14. Synthetic dataset  $T$ : representation of  $S_{HIM}$  and  $S_{HIM}^I$  stability indicators (with confidence intervals) for different instances of the FDR-corrected correlation networks, CORFDR( $10^{-2}$ ), CORFDR( $5 \cdot 10^{-3}$ ), and CORFDR( $10^{-4}$ ), WGCNA and MIC networks on the dataset  $T$  and for different values of data subsampling.**

doi:10.1371/journal.pone.0089815.g014

*InSilicoSize100-Yeast2* dataset with 100 nodes, originally a DREAM3 benchmark, generating 100 samples with default parameter configuration, including noise level, for wild-type steady state (the synthetic dataset  $Y$ ).

**Results.** We randomly extracted 10 subsets of different sample size  $N$  in  $\{10, 20, 30, 40, 50, 60, 70, 80, 90, 100\}$ , replicating the subset extraction procedure 50 times for each  $N$ . For each combination of  $N$  resampling, we inferred the network with the same nine algorithms used in the previous experiment.

As a general trend, stability decreases for larger sample size (see Fig. 8). The  $S_{HIM}$  stability curves for the two popular methods ARACNE and CLR drop quickly after 20% of the sample size, improving over Pearson and bicor. TOM and WGCNA are more stable but require at least 50% of the data. The standard MIC-based method with the default parameter ( $\alpha=0.6$ ) is much smoothed by the FDR correction. Overall, the FDR corrected methods are the most stable even for small samples. TOM and

WGCNA have the best internal stability  $S_{HIM}^I$  (Fig. 9), followed by the FDR-corrected methods.

Given that a gold standard is available for the simulated data in  $Y$ , we can compare the stability performance with reconstruction accuracy in terms of HIM and its components for the nine methods (Fig. 10). On this dataset, accuracy is independent of sample size, except for WGCNA and TOM which have an optimal range ( $N = \{30, 40\}$ ), given by their soft thresholding procedures. Note that the source Yeast subnetwork is unweighted while all methods return a weighted network: a  $10^{-3}$  threshold was thus applied to binarize the reconstructed network before computing the distances. Hence, MIC, cor and bicor perform badly as they lack an internal thresholding procedure; the FDR corrected methods have better but still mediocre results, slightly improved by CLR. On this dataset, WGCNA-FDR yields sparse networks (less than 20 edges) with small Hamming distances from the gold standard as they both have low density; however they have strongly different spectral structure from the gold standard,

**Table 4.** Synthetic dataset *T*: top ranked links for edge weight stability  $S_w$  on networks inferred by WGCNA, CORFDR( $\phi = 10^{-4}$ ), and MIC.

| WGCNA       |       | CORFDR( $10^{-4}$ ) |       | MIC         |       |
|-------------|-------|---------------------|-------|-------------|-------|
| $f_i - f_j$ | $S_w$ | $f_i - f_j$         | $S_w$ | $f_i - f_j$ | $S_w$ |
| 1 - 3       | 0.03  | 1 - 3               | 0.03  | 3 - 4       | 0.20  |
| 2 - 3       | 0.04  | 3 - 4               | 0.04  | 2 - 3       | 0.20  |
| 1 - 2       | 0.04  | 2 - 3               | 0.04  | 1 - 3       | 0.21  |
| 1 - 4       | 0.04  | 1 - 4               | 0.05  | 3 - 5       | 0.22  |
| 3 - 4       | 0.04  | 3 - 5               | 0.05  | 1 - 2       | 0.23  |
| 2 - 4       | 0.04  | 1 - 2               | 0.05  | 1 - 5       | 0.25  |
| 4 - 5       | 0.04  | 2 - 4               | 0.05  | 1 - 4       | 0.26  |
| 2 - 5       | 0.05  | 2 - 5               | 0.06  | 4 - 5       | 0.27  |
| 1 - 5       | 0.05  | 4 - 5               | 0.06  | 7 - 10      | 0.28  |
| 3 - 5       | 0.05  | 1 - 5               | 0.06  | 7 - 8       | 0.29  |
| 6 - 8       | 0.08  | 6 - 8               | 0.08  | 6 - 8       | 0.29  |
| 8 - 10      | 0.10  | 7 - 8               | 0.09  | 6 - 10      | 0.30  |
| 7 - 8       | 0.11  | 8 - 10              | 0.10  | 1 - 20      | 0.31  |
| 7 - 9       | 0.11  | 8 - 9               | 0.11  | 2 - 4       | 0.31  |
| 8 - 9       | 0.11  | 6 - 7               | 0.11  | 8 - 10      | 0.31  |
| 9 - 10      | 0.11  | 7 - 10              | 0.12  | 2 - 5       | 0.32  |
| 6 - 7       | 0.11  | 7 - 9               | 0.12  | 9 - 10      | 0.32  |
| 7 - 10      | 0.12  | 9 - 10              | 0.13  | 7 - 20      | 0.33  |
| 6 - 10      | 0.13  | 6 - 9               | 0.13  | 14 - 16     | 0.33  |
| 6 - 9       | 0.14  | 6 - 10              | 0.15  | 5 - 17      | 0.35  |
| 11 - 13     | 0.33  |                     |       | 6 - 7       | 0.35  |
| 14 - 15     | 0.41  |                     |       | 11 - 17     | 0.36  |
| 13 - 14     | 0.46  |                     |       | 6 - 9       | 0.36  |
| 12 - 13     | 0.58  |                     |       | 1 - 10      | 0.37  |
| 12 - 15     | 0.60  |                     |       | 10 - 11     | 0.37  |
| 11 - 14     | 0.62  |                     |       | 10 - 20     | 0.37  |
| 13 - 15     | 0.71  |                     |       | 4 - 17      | 0.37  |
| 11 - 15     | 0.78  |                     |       | 2 - 8       | 0.37  |
| 14 - 18     | 0.78  |                     |       | 4 - 10      | 0.37  |
| 3 - 11      | 0.83  |                     |       | 6 - 13      | 0.37  |
| 5 - 11      | 0.83  |                     |       | 2 - 14      | 0.37  |
| 1 - 11      | 0.84  |                     |       | 9 - 11      | 0.38  |
| 4 - 11      | 0.85  |                     |       | 15 - 16     | 0.38  |
| 3 - 10      | 0.87  |                     |       | 15 - 17     | 0.38  |
| 5 - 16      | 0.89  |                     |       | 7 - 13      | 0.39  |
| 8 - 17      | 0.89  |                     |       | 9 - 18      | 0.39  |
| 2 - 11      | 0.91  |                     |       | 12 - 19     | 0.39  |
| 8 - 12      | 0.91  |                     |       | 6 - 18      | 0.39  |
| 4 - 13      | 0.91  |                     |       | 8 - 9       | 0.39  |
| 1 - 13      | 0.93  |                     |       | 4 - 18      | 0.39  |
| 3 - 13      | 0.93  |                     |       | 16 - 17     | 0.39  |
| 8 - 13      | 0.94  |                     |       | 4 - 19      | 0.39  |
| 9 - 17      | 0.94  |                     |       | 16 - 19     | 0.39  |
| 1 - 16      | 0.95  |                     |       | 7 - 19      | 0.40  |
| 1 - 10      | 0.95  |                     |       | 5 - 8       | 0.40  |
| 14 - 16     | 0.97  |                     |       | 14 - 15     | 0.40  |
| 5 - 10      | 0.97  |                     |       | 13 - 15     | 0.40  |

**Table 4.** Cont.

| WGCNA       |       | CORFDR( $10^{-4}$ ) |       | MIC         |       |
|-------------|-------|---------------------|-------|-------------|-------|
| $f_i - f_j$ | $S_w$ | $f_i - f_j$         | $S_w$ | $f_i - f_j$ | $S_w$ |
| 11 - 12     | 0.98  |                     |       | 4 - 11      | 0.40  |
| 12 - 16     | 0.98  |                     |       | 7 - 9       | 0.41  |
| 2 - 13      | 0.99  |                     |       | 13 - 19     | 0.41  |

The links are ordered by  $S_w$  across all 20 resamplings of  $k$ 10 cross validation, for the three algorithms; the table includes the top 50 links for WGCNA and MIC, and all 20 links found by CORFDR( $\phi = 10^{-4}$ ).  
doi:10.1371/journal.pone.0089815.t004

as captured by the IM component. Finally, ARACNE achieves fair stability here as well as the highest accuracy.

**The effect of FDR control on stability**

We aim to assess differences in the stability of correlation networks inferred by an *ad-hoc* set of synthetic signals similar to expression data whenever inference is computed with or without False Discovery Rate (FDR) control.

**FDR control for correlation networks.** For an introduction to FDR methods, see for instance [51]. The procedure considered in this paper is explicitly described in Fig. 11. The FDR control defines a rule for choosing which edges to trust, and thus to keep,

**Table 5.** Synthetic dataset *T*: nodes ranked by stability degree  $S_d$  on networks inferred by WGCNA, CORFDR( $\phi = 10^{-4}$ ), and MIC.

| WGCNA |       | CORFDR( $10^{-4}$ ) |       | MIC   |       |
|-------|-------|---------------------|-------|-------|-------|
| $f_i$ | $S_d$ | $f_i$               | $S_d$ | $f_i$ | $S_d$ |
| 4     | 0.17  | 16                  | 0*    | 3     | 0.08  |
| 10    | 0.18  | 17                  | 0*    | 19    | 0.08  |
| 3     | 0.20  | 18                  | 0*    | 1     | 0.08  |
| 1     | 0.21  | 19                  | 0*    | 4     | 0.09  |
| 9     | 0.23  | 20                  | 0*    | 8     | 0.09  |
| 2     | 0.23  | 3                   | 0.03  | 10    | 0.09  |
| 5     | 0.24  | 1                   | 0.04  | 5     | 0.10  |
| 7     | 0.24  | 2                   | 0.04  | 2     | 0.10  |
| 6     | 0.24  | 5                   | 0.05  | 17    | 0.10  |
| 8     | 0.25  | 7                   | 0.07  | 20    | 0.10  |
| 11    | 0.40  | 8                   | 0.07  | 15    | 0.11  |
| 13    | 0.40  | 6                   | 0.09  | 9     | 0.11  |
| 15    | 0.43  | 9                   | 0.09  | 13    | 0.11  |
| 12    | 0.45  | 10                  | 0.09  | 11    | 0.11  |
| 14    | 0.48  | 4                   | 0.13  | 16    | 0.11  |
| 18    | 0.55  | 15                  | 4.42  | 12    | 0.11  |
| 16    | 0.60  | 14                  | 7.05  | 7     | 0.11  |
| 17    | 0.68  | 12                  | 22.82 | 6     | 0.12  |
| 20    | 0.70  | 13                  | 26.05 | 14    | 0.13  |
| 19    | 1.15  | 11                  | 41.83 | 18    | 0.13  |

The 20 nodes are ordered by  $S_d$  across all 20 resamplings by  $k$ 10 cross validation. (\*) indicates that range and mean are both zero.  
doi:10.1371/journal.pone.0089815.t005

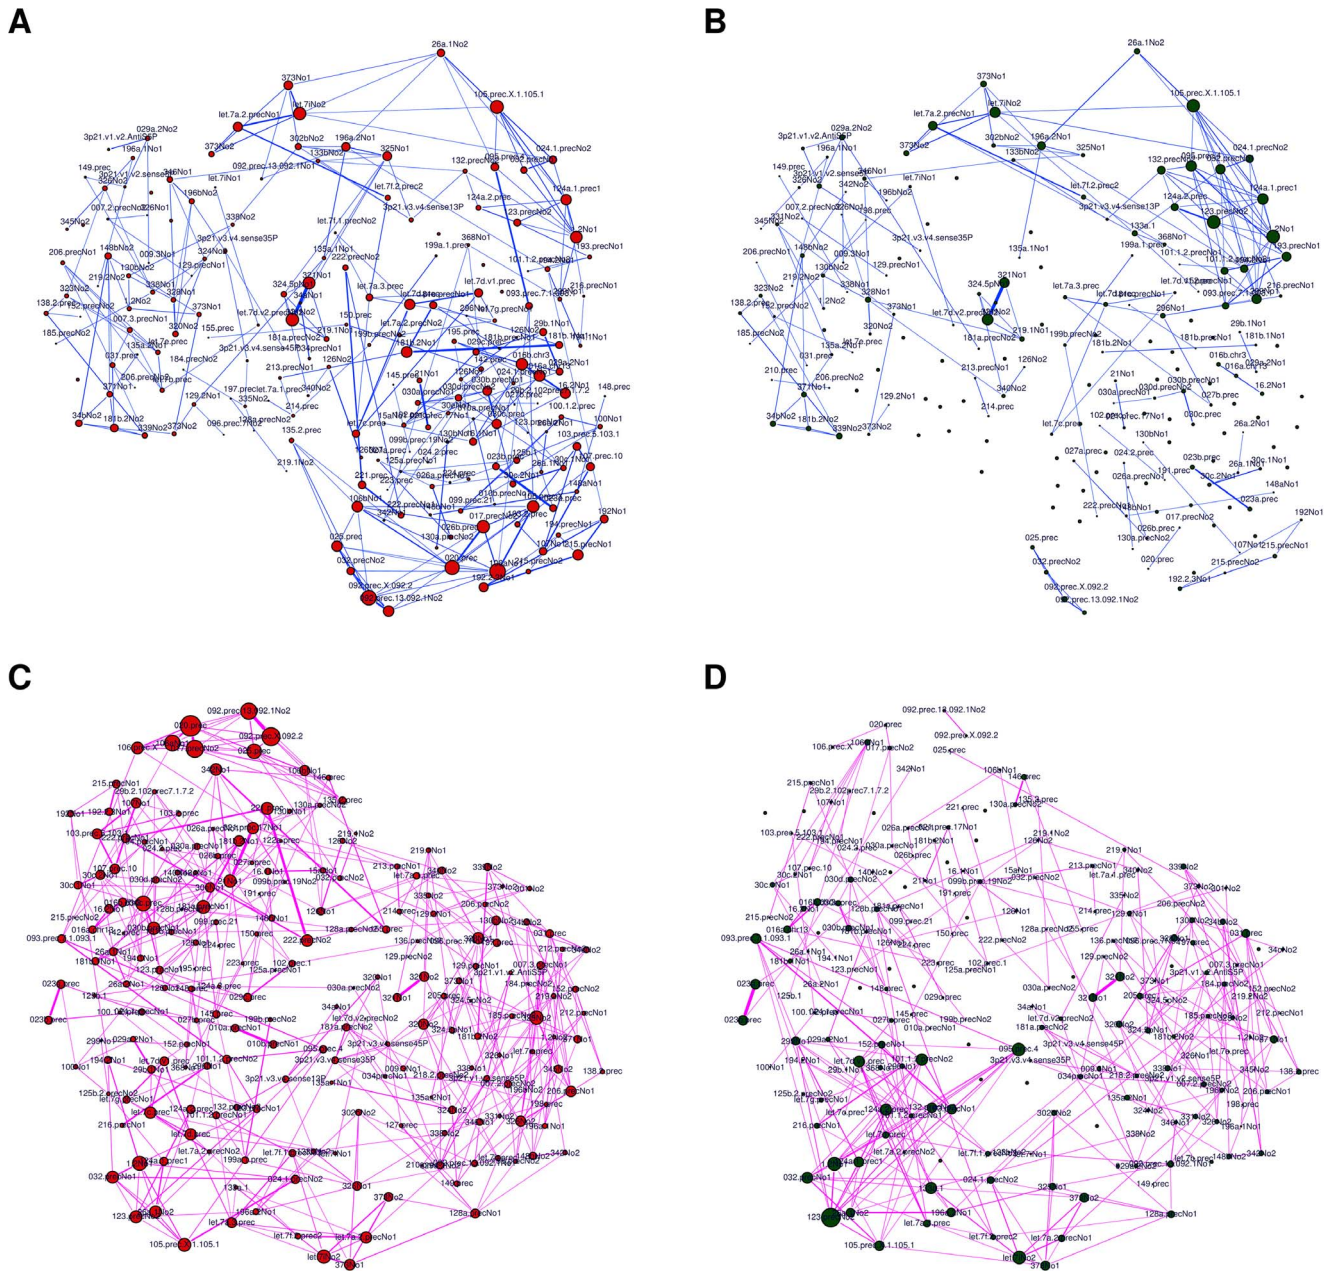

**Figure 15. HCC-B dataset: CLR networks in the hairball representation inferred from the 4 subsets (A) Male Tumoral (MT), (B) Male non Tumoral (MnT), (C) Female Tumoral (FT), and (D) Female non Tumoral (FnT).** Links are thresholded at weight 0.1, node position is fixed across the four networks, node dimension is proportional to the degree and edge width is proportional to link weight.  
doi:10.1371/journal.pone.0089815.g015

during the network reconstruction phase. An edge weight is given by the correlation coefficient between the signal values of two nodes  $h, k$ :  $a_{hk} = C(h, k) = |cor(x_h, x_k)|$ , where  $cor$  is a correlation function. If  $m$  is the sample size, we wish to estimate the chance that a random permutation of the expression values may give a correlation value higher than  $C(h, k)$ , thus removing the edge when this chance is larger than a permutational p-value  $\phi = 10^{-z}$ , where  $z$  is a chosen level of significance (typically  $z=3$ ). In practice, this test is implemented by counting how many times  $C(h, k)$  is smaller than the correlation between  $\sigma(x_h)$  and  $\tau(x_k)$ , where  $\sigma$  and  $\tau$  are distinct permutations of  $m$  objects. We consider here the absolute Pearson correlation at different  $\phi$  levels

CORFDR( $\phi$ ), when compared with WGCNA [30,43] with default thresholding parameter, as well as with the Maximal Information Coefficient (MIC), a non-linear correlation measure defined within the Maximal Information-based Nonparametric Exploration (MINE) statistics [45–47]. Note that the FDR correction procedure can be implemented with different correlation measures, such as WGCNA-FDR and MIC-FDR considered in the previous section.

**Data generation.** In this example, the correlation networks are inferred from a dataset  $T$  of 100 samples of 20 features  $\{f_1, \dots, f_{20}\}$ , via the Choleski decomposition (using the chol R

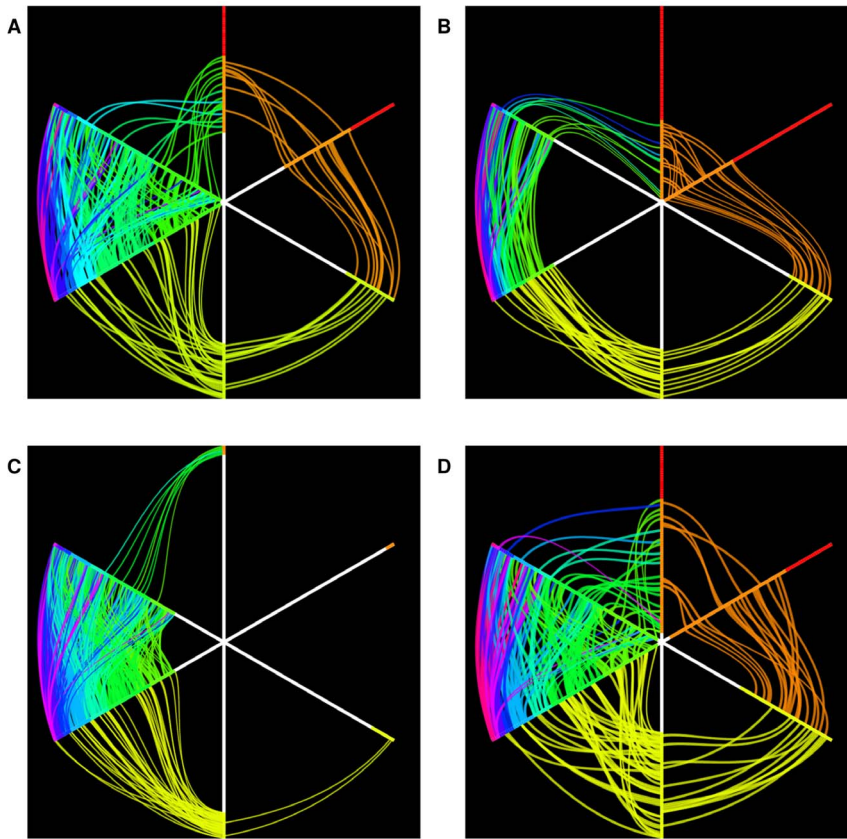

**Figure 16. HCC-B dataset: CLR networks in the hiveplot representation inferred from the 4 subsets (A) Male Tumoral (MT), (B) Male non Tumoral (MnT), (C) Female Tumoral (FT), and (D) Female non Tumoral (FnT).** Each plot consists of six axes with lines connecting points lying on the axes themselves. The axis  $\alpha_1$  pointing upwards collects all the nodes with (unweighted) degree 0 or 1;  $\alpha_2$ , the next axis moving clockwise, is a copy of  $\alpha_1$ ; the following two axes include all nodes with degree 2, while on the remaining two axes lie all nodes with degree 3 or more. Different colors indicate different degree. Nodes on axes are ranked by degree. Lines between two consecutive axes show the network's edges and edge color is inherited by the node with smaller degree. Note the absence of links between nodes of degree 1 and 2 in the FT case, and the smaller amount of connections between higher degree nodes in the MnT case with respect to the other three cases.  
doi:10.1371/journal.pone.0089815.g016

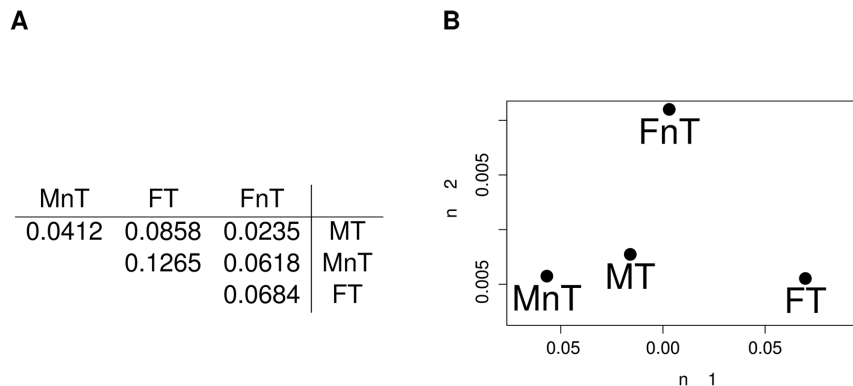

**Figure 17. HCC-B dataset: mutual HIM distances for CLR inferred networks.** Comparison of the four networks Male Tumoral (MT), Male non Tumoral (MnT), Female Tumoral (FT) and Female non Tumoral (FnT) reconstructed from the whole corresponding subsets in Tab. (A) and in the derived 2D multidimensional scaling plot (B).  
doi:10.1371/journal.pone.0089815.g017



**Table 6.** HCC-B dataset:  $S_{\text{HIM}}$  and  $S_{\text{HIM}}^l$  statistics for FnT network.

| Algorithm | k   | $S_{\text{HIM}}$ | $S_{\text{HIM}}$ CI (min; max) | $S_{\text{HIM}}$ Range (min; max) | $S_{\text{HIM}}^l$ | $S_{\text{HIM}}^l$ CI (min; max) | $S_{\text{HIM}}^l$ Range (min; max) |
|-----------|-----|------------------|--------------------------------|-----------------------------------|--------------------|----------------------------------|-------------------------------------|
| ARACNE    | LOO | 0.007            | (0.006; 0.009)                 | (0.002; 0.018)                    | 0.008              | (0.008; 0.009)                   | (0.001; 0.045)                      |
| ARACNE    | k2  | 0.037            | (0.030; 0.045)                 | (0.007; 0.097)                    | 0.032              | (0.031; 0.033)                   | (0.002; 0.179)                      |
| ARACNE    | k4  | 0.024            | (0.021; 0.027)                 | (0.004; 0.060)                    | 0.022              | (0.022; 0.023)                   | (0.002; 0.134)                      |
| ARACNE    | k10 | 0.013            | (0.012; 0.014)                 | (0.003; 0.036)                    | 0.014              | (0.013; 0.014)                   | (0.000; 0.081)                      |
| CLR       | LOO | 0.022            | (0.017; 0.027)                 | (0.003; 0.048)                    | 0.030              | (0.028; 0.032)                   | (0.001; 0.094)                      |
| CLR       | k2  | 0.094            | (0.071; 0.117)                 | (0.006; 0.257)                    | 0.119              | (0.113; 0.124)                   | (0.006; 0.391)                      |
| CLR       | k4  | 0.062            | (0.054; 0.072)                 | (0.005; 0.203)                    | 0.080              | (0.078; 0.082)                   | (0.003; 0.307)                      |
| CLR       | k10 | 0.032            | (0.029; 0.035)                 | (0.002; 0.093)                    | 0.045              | (0.044; 0.045)                   | (0.000; 0.179)                      |
| cor       | LOO | 0.021            | (0.017; 0.026)                 | (0.006; 0.051)                    | 0.031              | (0.030; 0.032)                   | (0.002; 0.122)                      |
| cor       | k2  | 0.117            | (0.104; 0.133)                 | (0.059; 0.221)                    | 0.145              | (0.143; 0.147)                   | (0.016; 0.431)                      |
| cor       | k4  | 0.070            | (0.065; 0.078)                 | (0.023; 0.172)                    | 0.093              | (0.092; 0.094)                   | (0.008; 0.347)                      |
| cor       | k10 | 0.038            | (0.036; 0.041)                 | (0.014; 0.120)                    | 0.053              | (0.053; 0.054)                   | (0.000; 0.279)                      |
| bicor     | LOO | 0.026            | (0.022; 0.031)                 | (0.012; 0.057)                    | 0.036              | (0.035; 0.037)                   | (0.004; 0.136)                      |
| bicor     | k2  | 0.117            | (0.105; 0.132)                 | (0.072; 0.227)                    | 0.151              | (0.148; 0.153)                   | (0.015; 0.445)                      |
| bicor     | k4  | 0.076            | (0.070; 0.083)                 | (0.033; 0.180)                    | 0.100              | (0.099; 0.101)                   | (0.007; 0.367)                      |
| bicor     | k10 | 0.044            | (0.041; 0.047)                 | (0.019; 0.126)                    | 0.060              | (0.059; 0.060)                   | (0.000; 0.286)                      |
| WGCNA     | LOO | 0.015            | (0.013; 0.018)                 | (0.005; 0.033)                    | 0.019              | (0.019; 0.020)                   | (0.003; 0.078)                      |
| WGCNA     | k2  | 0.099            | (0.086; 0.114)                 | (0.035; 0.198)                    | 0.094              | (0.092; 0.096)                   | (0.017; 0.341)                      |
| WGCNA     | k4  | 0.048            | (0.043; 0.055)                 | (0.015; 0.115)                    | 0.057              | (0.056; 0.057)                   | (0.007; 0.251)                      |
| WGCNA     | k10 | 0.026            | (0.025; 0.028)                 | (0.006; 0.081)                    | 0.033              | (0.033; 0.034)                   | (0.000; 0.187)                      |
| MINE      | LOO | 0.035            | (0.031; 0.039)                 | (0.018; 0.054)                    | 0.040              | (0.040; 0.041)                   | (0.003; 0.096)                      |
| MINE      | k2  | 0.138            | (0.125; 0.157)                 | (0.084; 0.277)                    | 0.149              | (0.146; 0.151)                   | (0.020; 0.482)                      |
| MINE      | k4  | 0.150            | (0.138; 0.161)                 | (0.050; 0.259)                    | 0.105              | (0.105; 0.106)                   | (0.007; 0.335)                      |
| MINE      | k10 | 0.067            | (0.064; 0.071)                 | (0.029; 0.138)                    | 0.067              | (0.066; 0.067)                   | (0.000; 0.253)                      |
| TOM       | LOO | 0.020            | (0.017; 0.025)                 | (0.007; 0.047)                    | 0.025              | (0.024; 0.026)                   | (0.003; 0.108)                      |
| TOM       | k2  | 0.133            | (0.115; 0.154)                 | (0.046; 0.271)                    | 0.117              | (0.114; 0.119)                   | (0.011; 0.467)                      |
| TOM       | k4  | 0.065            | (0.057; 0.075)                 | (0.017; 0.161)                    | 0.073              | (0.072; 0.074)                   | (0.010; 0.348)                      |
| TOM       | k10 | 0.035            | (0.033; 0.038)                 | (0.007; 0.116)                    | 0.043              | (0.043; 0.044)                   | (0.000; 0.268)                      |

Values of the indicators  $S_{\text{HIM}}$  and  $S_{\text{HIM}}^l$  together with bootstrap confidence intervals and range for the inferred networks for different values of data subsampling. doi:10.1371/journal.pone.0089815.t006

function) of its correlation matrix  $M_T$ , randomly generated according to the following three constraints:

$$\text{cor}(f_i, f_j) \approx \begin{cases} 0.9 & \text{for } 1 \leq ij \leq 5 \\ 0.7 & \text{for } 6 \leq ij \leq 10 \\ 0.4 & \text{for } 11 \leq ij \leq 15, \end{cases}$$

where  $\text{cor}$  is the Pearson correlation. The correlation matrix  $M_T$  is plotted in Fig. 12: the correlation values in the three groups defined by the above constraints represent true relations between the variables, while all other smaller correlation values are due to the underlying random generation model for  $M_T$ .

**Results.** Starting from the dataset  $T$ , we built five correlation networks, using MIC, WGCNA, and CORFDR( $\rho$ ) with  $p$ -values  $\rho = 10^{-2}, 5 \cdot 10^{-3}, 10^{-4}$ .

The three networks displayed in Fig. 13(A-C) were inferred with WGCNA, CORFDR( $10^{-4}$ ) and MIC respectively. WGCNA and MIC generate two fully connected networks with a majority of

weak links, while CORFDR correctly selects only links within the two disjoint sets of nodes  $\{f_i : 1 \leq i \leq 5\}$  and  $\{f_i : 6 \leq i \leq 10\}$ , corresponding to the strongest correlations in the matrix  $M_T$ .

Note that although both WGCNA and CORFDR( $10^{-4}$ ) employ  $\text{cor}$  internally, the two algorithms can lead to different results. Indeed the soft thresholding procedure in WGCNA [43] defines weights as  $a_{ij} = |\text{cor}(x_i, x_j)|^\beta$  for  $\beta = 6$ , while for CORFDR( $10^{-4}$ ) is  $a_{ij} = |\text{cor}(x_i, x_j)|$  if  $|F_T^4(i, j)| \leq 1$ , according to the definition in Fig. 11.

Stability estimates are also less variable with the FDR corrected methods. We compared  $k$ -fold cross-validation estimates of  $S_{\text{HIM}}$  and  $S_{\text{HIM}}^l$  for the five networks, with  $k = 1, 2, 4, 10$ . Results are presented in Tab. 3 and displayed in Fig. 14. On this dataset,  $S_{\text{HIM}}$  ranges over  $[0.001, 0.108]$  for WGCNA,  $[0.004, 0.158]$  for MIC, and only over  $[0.000, 0.053]$  for CORFDR( $10^{-4}$ ). Note that estimates are both smaller and less variable for the smallest  $p$ -value, as noise effects are filtered. Hence, the use of a FDR control procedure helps stabilize the correlation based inference procedure, improving the performance of WGCNA, already one of the more robust options for real data [52].

**Table 7.** HCC-B dataset:  $S_{HIM}$  and  $S'_{HIM}$  statistics for FT network.

| Algorithm | k   | $S_{HIM}$ | $S_{HIM}$ CI (min; max) | $S_{HIM}$ Range (min; max) | $S'_{HIM}$ | $S'_{HIM}$ CI (min; max) | $S'_{HIM}$ Range (min; max) |
|-----------|-----|-----------|-------------------------|----------------------------|------------|--------------------------|-----------------------------|
| ARACNE    | LOO | 0.007     | (0.006; 0.010)          | (0.001; 0.024)             | 0.009      | (0.009; 0.010)           | (0.001; 0.053)              |
| ARACNE    | k2  | 0.032     | (0.024; 0.053)          | (0.008; 0.221)             | 0.036      | (0.034; 0.039)           | (0.003; 0.405)              |
| ARACNE    | k4  | 0.016     | (0.014; 0.018)          | (0.005; 0.054)             | 0.019      | (0.019; 0.020)           | (0.002; 0.137)              |
| ARACNE    | k10 | 0.012     | (0.010; 0.013)          | (0.002; 0.061)             | 0.014      | (0.014; 0.014)           | (0.000; 0.120)              |
| CLR       | LOO | 0.022     | (0.016; 0.032)          | (0.002; 0.093)             | 0.032      | (0.030; 0.035)           | (0.001; 0.143)              |
| CLR       | k2  | 0.069     | (0.056; 0.082)          | (0.006; 0.154)             | 0.089      | (0.084; 0.093)           | (0.005; 0.250)              |
| CLR       | k4  | 0.057     | (0.049; 0.066)          | (0.004; 0.190)             | 0.078      | (0.076; 0.080)           | (0.003; 0.305)              |
| CLR       | k10 | 0.040     | (0.037; 0.044)          | (0.002; 0.177)             | 0.054      | (0.054; 0.055)           | (0.000; 0.143)              |
| cor       | LOO | 0.019     | (0.016; 0.024)          | (0.008; 0.044)             | 0.028      | (0.028; 0.029)           | (0.003; 0.105)              |
| cor       | k2  | 0.122     | (0.111; 0.138)          | (0.079; 0.221)             | 0.144      | (0.142; 0.147)           | (0.014; 0.346)              |
| cor       | k4  | 0.067     | (0.063; 0.073)          | (0.036; 0.141)             | 0.088      | (0.087; 0.088)           | (0.007; 0.274)              |
| cor       | k10 | 0.037     | (0.036; 0.039)          | (0.019; 0.083)             | 0.051      | (0.051; 0.051)           | (0.000; 0.196)              |
| bicor     | LOO | 0.022     | (0.019; 0.027)          | (0.012; 0.049)             | 0.031      | (0.031; 0.032)           | (0.004; 0.108)              |
| bicor     | k2  | 0.116     | (0.107; 0.130)          | (0.073; 0.217)             | 0.148      | (0.146; 0.150)           | (0.012; 0.364)              |
| bicor     | k4  | 0.069     | (0.065; 0.074)          | (0.038; 0.137)             | 0.092      | (0.091; 0.092)           | (0.009; 0.282)              |
| bicor     | k10 | 0.040     | (0.039; 0.042)          | (0.022; 0.085)             | 0.055      | (0.055; 0.055)           | (0.000; 0.202)              |
| WGCNA     | LOO | 0.010     | (0.008; 0.013)          | (0.003; 0.025)             | 0.013      | (0.013; 0.014)           | (0.002; 0.070)              |
| WGCNA     | k2  | 0.109     | (0.095; 0.124)          | (0.026; 0.194)             | 0.070      | (0.068; 0.072)           | (0.016; 0.269)              |
| WGCNA     | k4  | 0.043     | (0.039; 0.049)          | (0.008; 0.099)             | 0.039      | (0.038; 0.039)           | (0.007; 0.182)              |
| WGCNA     | k10 | 0.022     | (0.020; 0.023)          | (0.005; 0.066)             | 0.024      | (0.024; 0.024)           | (0.000; 0.141)              |
| MINE      | LOO | 0.031     | (0.028; 0.034)          | (0.016; 0.051)             | 0.032      | (0.031; 0.032)           | (0.003; 0.095)              |
| MINE      | k2  | 0.138     | (0.128; 0.149)          | (0.094; 0.216)             | 0.129      | (0.128; 0.131)           | (0.007; 0.321)              |
| MINE      | k4  | 0.201     | (0.194; 0.207)          | (0.132; 0.257)             | 0.088      | (0.088; 0.089)           | (0.005; 0.243)              |
| MINE      | k10 | 0.077     | (0.075; 0.080)          | (0.040; 0.138)             | 0.054      | (0.054; 0.054)           | (0.000; 0.193)              |
| TOM       | LOO | 0.015     | (0.011; 0.019)          | (0.004; 0.038)             | 0.018      | (0.017; 0.019)           | (0.002; 0.105)              |
| TOM       | k2  | 0.148     | (0.128; 0.170)          | (0.023; 0.269)             | 0.092      | (0.090; 0.095)           | (0.012; 0.386)              |
| TOM       | k4  | 0.060     | (0.053; 0.069)          | (0.011; 0.143)             | 0.053      | (0.052; 0.054)           | (0.006; 0.272)              |
| TOM       | k10 | 0.031     | (0.029; 0.033)          | (0.006; 0.097)             | 0.033      | (0.033; 0.033)           | (0.000; 0.212)              |

Values of the indicators  $S_{HIM}$  and  $S'_{HIM}$  together with bootstrap confidence intervals and range for the inferred networks for different values of data subsampling. doi:10.1371/journal.pone.0089815.t007

Results for weight stability and degree stability are listed in Tab. 4 and Tab. 5, respectively, comparing the rankings for WGCNA, CORFDR( $10^{-4}$ ) and MIC for a  $k10$  resampling. The stability indicators give information consistent with the structure of the starting correlation matrix  $M_T$ : inference by WGCNA (Fig. 13 A) exactly reconstructs the block structure with three subnetworks (blue:  $Corr \approx 0.9$ , green  $Corr \approx 0.7$ , orange:  $Corr \approx 0.4$ ), while the FDR corrected version (Fig. 13 B) selects only two subnetworks corresponding to the two top correlated feature blocks of Fig. 12. In the WGCNA case, the top 20 most stable links (Tab. 4) are those of the two cliques  $F_{1,5} = \{f_i : 1 \leq i \leq 5\}$  and  $F_{6,10} = \{f_i : 6 \leq i \leq 10\}$  with largest correlation values in  $M_T$ . The correct block structure is found by CORFDR( $10^{-4}$ ) with approximately the same values of  $S_w$  found by the WGCNA network, where minor differences are due to the different thresholding procedures.

The  $F_{11,15} = \{f_i : 11 \leq i \leq 15\}$  variables (mutual correlation of about 0.3 imposed by design of  $M_T$ ) are also mostly top ranked links for WGCNA, but with larger instability values (0.33–0.78 vs. 0.03–0.14). The remaining links are the least stable, with  $S_w$  values always larger than 0.83: they are the randomly correlated links of

$M_T$ . Similar but not identical results are found for the network  $M$ , as expected given that the MIC statistic aims at detecting generic associations between variables and it is expected to have reduced statistical power with low sample sizes. The structure of the network (Fig. 13 C) does not reflect the design linear correlation structure. Indeed, several links are ranked differently as the expected: although many links in the  $F_{1,5}$  and  $F_{6,10}$  groups are highly ranked, some of them can also be found in much lower positions (e.g. 6–7, 6–9, or 7–9 are ranked lower than 20; 7–10, 7–8 are ranked higher than 2–4, 2–5; 1–20, 7–20, 14–16, and 5–17 are ranked within the top 20 links).

Similar considerations hold for the ranking of the most stable nodes: for WGCNA, the top-ranked nodes are the  $F_{1,5}$  and the  $F_{6,10}$  (with similar  $S_d$  values); those in  $F_{11,15}$  come next, leaving the remaining five as the least stable with higher  $S_d$  values. These nodes are trivially the most stable for CORFDR( $10^{-4}$ ) as they are never wired to any other node in any of the resampling and thus their  $S_d$  values are void.

The nodes  $F_{1,5} \cup F_{6,10}$  then follow in the ranking with small associated values, and the nodes  $F_{11,15}$  close the standing with definitely higher values. In fact, although the nodes  $F_{11,15}$  have

**Table 8.** HCC-B dataset:  $S_{HIM}$  and  $S_{HIM}^l$  statistics for MnT network.

| Algorithm | k   | $S_{HIM}$ | $S_{HIM}$ CI (min; max) | $S_{HIM}$ Range (min; max) | $S_{HIM}^l$ | $S_{HIM}^l$ CI (min; max) | $S_{HIM}^l$ Range (min; max) |
|-----------|-----|-----------|-------------------------|----------------------------|-------------|---------------------------|------------------------------|
| ARACNE    | LOO | 0.002     | (0.002; 0.002)          | (0.001; 0.004)             | 0.002       | (0.002; 0.002)            | (0.000; 0.011)               |
| ARACNE    | k2  | 0.014     | (0.011; 0.016)          | (0.003; 0.033)             | 0.012       | (0.012; 0.012)            | (0.002; 0.056)               |
| ARACNE    | k4  | 0.007     | (0.006; 0.008)          | (0.003; 0.022)             | 0.008       | (0.007; 0.008)            | (0.001; 0.046)               |
| ARACNE    | k10 | 0.005     | (0.004; 0.005)          | (0.002; 0.011)             | 0.005       | (0.005; 0.005)            | (0.001; 0.027)               |
| CLR       | LOO | 0.002     | (0.002; 0.002)          | (0.000; 0.009)             | 0.003       | (0.003; 0.003)            | (0.000; 0.016)               |
| CLR       | k2  | 0.033     | (0.026; 0.041)          | (0.003; 0.104)             | 0.037       | (0.035; 0.039)            | (0.002; 0.158)               |
| CLR       | k4  | 0.018     | (0.015; 0.022)          | (0.001; 0.067)             | 0.025       | (0.024; 0.026)            | (0.001; 0.102)               |
| CLR       | k10 | 0.009     | (0.008; 0.010)          | (0.001; 0.034)             | 0.013       | (0.013; 0.013)            | (0.001; 0.061)               |
| cor       | LOO | 0.003     | (0.003; 0.004)          | (0.001; 0.020)             | 0.005       | (0.005; 0.005)            | (0.000; 0.047)               |
| cor       | k2  | 0.050     | (0.044; 0.057)          | (0.028; 0.094)             | 0.065       | (0.064; 0.066)            | (0.007; 0.219)               |
| cor       | k4  | 0.031     | (0.028; 0.034)          | (0.013; 0.080)             | 0.042       | (0.041; 0.042)            | (0.005; 0.180)               |
| cor       | k10 | 0.018     | (0.017; 0.019)          | (0.007; 0.056)             | 0.025       | (0.025; 0.025)            | (0.002; 0.134)               |
| bicor     | LOO | 0.004     | (0.004; 0.004)          | (0.001; 0.011)             | 0.005       | (0.005; 0.005)            | (0.000; 0.027)               |
| bicor     | k2  | 0.046     | (0.041; 0.054)          | (0.026; 0.103)             | 0.063       | (0.062; 0.064)            | (0.009; 0.240)               |
| bicor     | k4  | 0.031     | (0.028; 0.034)          | (0.014; 0.093)             | 0.042       | (0.042; 0.043)            | (0.005; 0.197)               |
| bicor     | k10 | 0.018     | (0.017; 0.019)          | (0.008; 0.050)             | 0.025       | (0.024; 0.025)            | (0.002; 0.122)               |
| WGCNA     | LOO | 0.002     | (0.002; 0.003)          | (0.000; 0.019)             | 0.003       | (0.003; 0.003)            | (0.000; 0.039)               |
| WGCNA     | k2  | 0.037     | (0.032; 0.044)          | (0.009; 0.078)             | 0.044       | (0.043; 0.045)            | (0.011; 0.181)               |
| WGCNA     | k4  | 0.021     | (0.019; 0.024)          | (0.006; 0.059)             | 0.026       | (0.026; 0.027)            | (0.005; 0.132)               |
| WGCNA     | k10 | 0.013     | (0.012; 0.014)          | (0.003; 0.044)             | 0.016       | (0.016; 0.016)            | (0.002; 0.100)               |
| MINE      | LOO | 0.005     | (0.005; 0.005)          | (0.002; 0.008)             | 0.006       | (0.006; 0.006)            | (0.000; 0.019)               |
| MINE      | k2  | 0.132     | (0.123; 0.143)          | (0.059; 0.199)             | 0.064       | (0.063; 0.065)            | (0.006; 0.233)               |
| MINE      | k4  | 0.052     | (0.048; 0.058)          | (0.021; 0.126)             | 0.041       | (0.040; 0.041)            | (0.004; 0.186)               |
| MINE      | k10 | 0.019     | (0.019; 0.021)          | (0.012; 0.055)             | 0.025       | (0.025; 0.025)            | (0.002; 0.121)               |
| TOM       | LOO | 0.003     | (0.003; 0.004)          | (0.000; 0.023)             | 0.004       | (0.004; 0.004)            | (0.000; 0.052)               |
| TOM       | k2  | 0.051     | (0.043; 0.060)          | (0.011; 0.111)             | 0.058       | (0.056; 0.059)            | (0.010; 0.253)               |
| TOM       | k4  | 0.029     | (0.026; 0.033)          | (0.007; 0.085)             | 0.035       | (0.034; 0.035)            | (0.005; 0.193)               |
| TOM       | k10 | 0.017     | (0.016; 0.018)          | (0.003; 0.060)             | 0.021       | (0.021; 0.021)            | (0.003; 0.138)               |

Values of the indicators  $S_{HIM}$  and  $S_{HIM}^l$  together with bootstrap confidence intervals and range for the inferred networks for different values of data subsampling. doi:10.1371/journal.pone.0089815.t008

degree zero in the network  $CORFDR(10^{-4})$  inferred from the whole  $T$ , some links connecting them have weight over the threshold in several resamplings. Note that the ranking values for MIC span a narrow range, with most of the nodes in  $F_{1,5}$  in top positions, in general yielding a weak relation with the structure of  $M_T$ .

The weight and degree stability analysis for the other subsampling cases (LOO,  $k2$  and  $k10$ ) are almost identical and thus not shown here.

### miRNA networks for hepatocellular carcinoma

Investigating the relationships connecting human microRNA (miRNA) and how they evolve in cancer is a key issue for researchers in biology [53,54]. Hepatocellular carcinoma (HCC) is a notable example [55,56]: we test the NetSI indicators on a miRNA microarray hepatocellular carcinoma dataset with two phenotypes as a tool for differential network analysis. As CLR was used in the original paper, we applied this inference method and compared its stability with the reconstruction algorithms previously employed on the synthetic datasets.

**Data description.** The HCC dataset (HCC-B) [31,32] is publicly available at the Gene Expression Omnibus (GEO) <http://www.ncbi.nlm.nih.gov/geo> with accession number GSE6857. The dataset collects 482 tissue samples from 241 patients affected by HCC. For each patient, a sample from cancerous hepatic tissue and a sample from surrounding non-cancerous hepatic tissue are available, hybridized on the Ohio State University CCC MicroRNA Microarray Version 2.0 platform consisting of 11,520 probes measuring the expression of 250 non-redundant human and 200 mouse miRNAs. After imputation of missing values [57], probes corresponding to non-human (mouse and controls) miRNAs were discarded; samples for one patient (AN) were eliminated. We thus obtained a dataset of 240+240 paired samples described by 210 human miRNAs (210 males, 30 females). Thus HCC-B can be split into four subsets by combining the gender and disease status phenotypes, respectively for tissues of male cancer patients (MT), female cancer patients (FT) and the corresponding non cancer tissues (MnT and FnT).

For validation, we considered a second dataset (HCC-W) recently used to derive a signature of 30 miRNAs for hepatocellular carcinoma [58]. miRNA expression data for 166 subjects

**Table 9.** HCC-B dataset:  $S_{HIM}$  and  $S_{HIM}^l$  statistics for MT network.

| Algorithm | k   | $S_{HIM}$ | $S_{HIM}$ CI (min; max) | $S_{HIM}$ Range (min; max) | $S_{HIM}^l$ | $S_{HIM}^l$ CI (min; max) | $S_{HIM}^l$ Range (min; max) |
|-----------|-----|-----------|-------------------------|----------------------------|-------------|---------------------------|------------------------------|
| ARACNE    | LOO | 0.001     | (0.001; 0.002)          | (0.000; 0.008)             | 0.002       | (0.002; 0.002)            | (0.000; 0.017)               |
| ARACNE    | k2  | 0.017     | (0.014; 0.020)          | (0.004; 0.039)             | 0.012       | (0.012; 0.013)            | (0.002; 0.054)               |
| ARACNE    | k4  | 0.009     | (0.008; 0.010)          | (0.002; 0.021)             | 0.008       | (0.008; 0.008)            | (0.001; 0.039)               |
| ARACNE    | k10 | 0.005     | (0.005; 0.006)          | (0.001; 0.015)             | 0.005       | (0.005; 0.005)            | (0.001; 0.033)               |
| CLR       | LOO | 0.002     | (0.002; 0.002)          | (0.000; 0.018)             | 0.003       | (0.003; 0.003)            | (0.000; 0.030)               |
| CLR       | k2  | 0.040     | (0.033; 0.051)          | (0.003; 0.146)             | 0.051       | (0.048; 0.054)            | (0.003; 0.218)               |
| CLR       | k4  | 0.024     | (0.020; 0.029)          | (0.002; 0.099)             | 0.033       | (0.032; 0.033)            | (0.001; 0.148)               |
| CLR       | k10 | 0.011     | (0.010; 0.013)          | (0.001; 0.048)             | 0.016       | (0.016; 0.016)            | (0.001; 0.092)               |
| cor       | LOO | 0.003     | (0.003; 0.004)          | (0.001; 0.013)             | 0.005       | (0.005; 0.005)            | (0.000; 0.028)               |
| cor       | k2  | 0.046     | (0.041; 0.054)          | (0.029; 0.105)             | 0.063       | (0.062; 0.064)            | (0.008; 0.254)               |
| cor       | k4  | 0.028     | (0.026; 0.030)          | (0.016; 0.052)             | 0.038       | (0.037; 0.038)            | (0.005; 0.132)               |
| cor       | k10 | 0.017     | (0.016; 0.018)          | (0.008; 0.041)             | 0.023       | (0.023; 0.023)            | (0.002; 0.101)               |
| bicor     | LOO | 0.004     | (0.003; 0.004)          | (0.001; 0.013)             | 0.005       | (0.005; 0.005)            | (0.000; 0.028)               |
| bicor     | k2  | 0.049     | (0.044; 0.058)          | (0.027; 0.112)             | 0.067       | (0.066; 0.068)            | (0.009; 0.272)               |
| bicor     | k4  | 0.029     | (0.027; 0.031)          | (0.016; 0.061)             | 0.039       | (0.039; 0.040)            | (0.004; 0.148)               |
| bicor     | k10 | 0.018     | (0.017; 0.019)          | (0.009; 0.042)             | 0.025       | (0.025; 0.025)            | (0.002; 0.105)               |
| WGCNA     | LOO | 0.002     | (0.002; 0.002)          | (0.000; 0.009)             | 0.003       | (0.003; 0.003)            | (0.000; 0.020)               |
| WGCNA     | k2  | 0.034     | (0.029; 0.040)          | (0.009; 0.075)             | 0.038       | (0.037; 0.039)            | (0.008; 0.175)               |
| WGCNA     | k4  | 0.018     | (0.016; 0.021)          | (0.006; 0.046)             | 0.022       | (0.022; 0.023)            | (0.004; 0.122)               |
| WGCNA     | k10 | 0.011     | (0.010; 0.012)          | (0.002; 0.028)             | 0.013       | (0.013; 0.013)            | (0.002; 0.075)               |
| MINE      | LOO | 0.006     | (0.006; 0.006)          | (0.002; 0.010)             | 0.006       | (0.006; 0.006)            | (0.000; 0.018)               |
| MINE      | k2  | 0.173     | (0.163; 0.183)          | (0.111; 0.242)             | 0.060       | (0.059; 0.061)            | (0.004; 0.220)               |
| MINE      | k4  | 0.065     | (0.061; 0.070)          | (0.027; 0.117)             | 0.037       | (0.036; 0.037)            | (0.003; 0.149)               |
| MINE      | k10 | 0.020     | (0.019; 0.021)          | (0.011; 0.046)             | 0.024       | (0.024; 0.024)            | (0.001; 0.099)               |
| TOM       | LOO | 0.003     | (0.003; 0.003)          | (0.000; 0.012)             | 0.003       | (0.003; 0.004)            | (0.000; 0.028)               |
| TOM       | k2  | 0.046     | (0.039; 0.054)          | (0.011; 0.102)             | 0.049       | (0.047; 0.051)            | (0.008; 0.246)               |
| TOM       | k4  | 0.025     | (0.022; 0.028)          | (0.007; 0.062)             | 0.029       | (0.029; 0.030)            | (0.003; 0.168)               |
| TOM       | k10 | 0.015     | (0.013; 0.016)          | (0.003; 0.038)             | 0.017       | (0.017; 0.017)            | (0.002; 0.102)               |

Values of the indicators  $S_{HIM}$  and  $S_{HIM}^l$  together with bootstrap confidence intervals and range for the inferred networks for different values of data subsampling. doi:10.1371/journal.pone.0089815.t009

(paired samples for 141 males and 25 females), acquired with the CapitalBio custom two-channel microarray platform (692 probes), are available at GEO accession number GSE31384. Data are processed as normalized differential miRNA expression levels between tumors and non cancerous liver tissue data [58].

**Results.** Using the CLR algorithm we first generated the four networks inferred from the whole set of datasets and corresponding to the combinations of the two binary phenotypes, discarding links with weight smaller than 0.1. Two different representations of the resulting graphs are shown in Fig. 15 and Fig. 16, respectively in hairball and hiveplot layouts [59]. The second visualization technique is particularly useful in highlighting differences between networks by disaggregating the network structure according to their node degree. The four networks have different structures: more high degree links are present for tumoral tissues (graphs for MT and FT: Fig. 16 A and C) than for controls (MnT, FnT). Their density values, defined as the ratio between the number of existing edges and the maximal number of edges for the given graph), are 0.0153 (MT), 0.0092 (MnT), 0.0206 (FT) and 0.0121 (FnT). The mutual HIM distances for the four networks are reported in Fig. 17 A, together with the corresponding

two-dimensional scaling plot (Fig. 17 B). The networks corresponding to the female patients (and, in particular, the FT inferred from cancer tissue) are different from those inferred for the male patients.

In order to explore network reconstruction reliability, we then computed the NetSI indicators and compared the results for CLR with other six reconstruction algorithms ARACNE, cor, TOM, bicor, WGCNA and MIC. The corresponding statistics for the four subsets and different subsampling (LOO, k2, k4, and k10) are listed in Tables 6–9 and summarized in Fig. 18. Both the resampling strategy and phenotypes have an impact on the network stability, differently for the seven methods: the networks corresponding to male patients have smaller values for  $S_{HIM}$  and  $S_{HIM}^l$  (and thus they are much more stable) than the corresponding female counterparts. The leave-one-out stability for FT and FnT is worse than for k10 and k4 stability on MT and MnT. However phenotypes have a stronger effect than the resampling strategy. Note that while control and cancer networks display similar stability for males at all levels of subsampling ratio, the FT network is more stable than the matching FnT control networks;

this is evident when the size of the subset used for inference gets smaller, in particular for  $k2$ .

To validate the interest of the stability analysis in terms of biological relevance and reproducibility, we applied the  $S_w$  weight stability indicator and ranked accordingly the links for networks inferred with CLR on the MT, MnT, FT, FnT subsets. Our hypothesis is that, in practical cases, stability may be either an effect of real biological relevance of the link or highlight trivial relationships between nodes. In the former situation, we expect that stable links have a better chance of being reproduced on new datasets. However, the comparison between miRNA studies is often haunted by the significant changes across releases of the annotation datasets. It is not uncommon that a miRNA may get discarded or unified with others in a newer release, or that miRNA symbols may just be remapped to different sequences.

As an experiment, we considered the first six top ranked edges for the four networks, obtaining seven distinct pairs of miRNAs according to the original annotation (Tab. 10). As reported by the original GEO platform (accession number GPL4700), the HCC-B dataset [31] used the miRBase June 2004 or information collected from literature. The two miRNA hsa-mir-321No1 and hsa-mir-321No2 had the same mature Sanger registry name in the miRBase June 2004, and were eliminated and marked as tRNA in the June 2013 version. Not surprisingly they define a link (link (a) in the table) which is trivially the most stable for all four networks, regardless of the phenotypes. Similarly the pairs of miRNA defining the links (b) and (c) can be found to align to the same sequences by considering miRBase June 2013. Note that (c) is

associated with the mature miR21, which is a known oncomir [60]. The hsa-mir-219-1 in link (d) is one of the 20 miRNAs in the signature proposed by Budhu and colleagues [31]; in our table it is differently stable for gender, which is consistent with being associated with estrogen regulation and overexpressed in breast cancer [61,62]. The link (e) connects hsa-mir-326 with hsa-mir-342; the first node is known to be involved in brain tumorigenesis [63,64] and it is directly related to microRNA gene expression profile of hepatitis C virus-associated hepatocellular carcinoma [65]. The second node is associated with different cancers and recently proposed as a diagnostic biomarker and therapeutic target for HCC [66].

Both nodes defining link (f) are associated with cancer [67-69], namely with HRC in hepatitis infection and cirrhosis [53,70]. A search by sequence with the miRBase web-service [71] shows that the two probes hsa-mir-192.2.3No1 and hsa-mir-215.precNo have a high alignment score (e value: 0.02 [72]). In our analysis, the link is very stable in tumours and definitely unstable on controls.

Link (g) connects hsa-mir-092.prec.13.092.1No2 and hsa-mir-092.prec.X.092.2: it is the most stable for FT. The two miRNAs are to known to be associated with chronic lymphocytic leukemia [73], found respectively in genomics regions related to follicular lymphoma and advanced ovarian cancer.

Finally, we compared a disease network inferred from HCC-B [31] with the one from HCC-W using the stability indicators, also considering the 30 miRNAs signature for hepatocellular carcinoma derived from this dataset [58]. As a preliminary step, data from HCC-B were also normalized as ratios (tumor/non-tumor), then

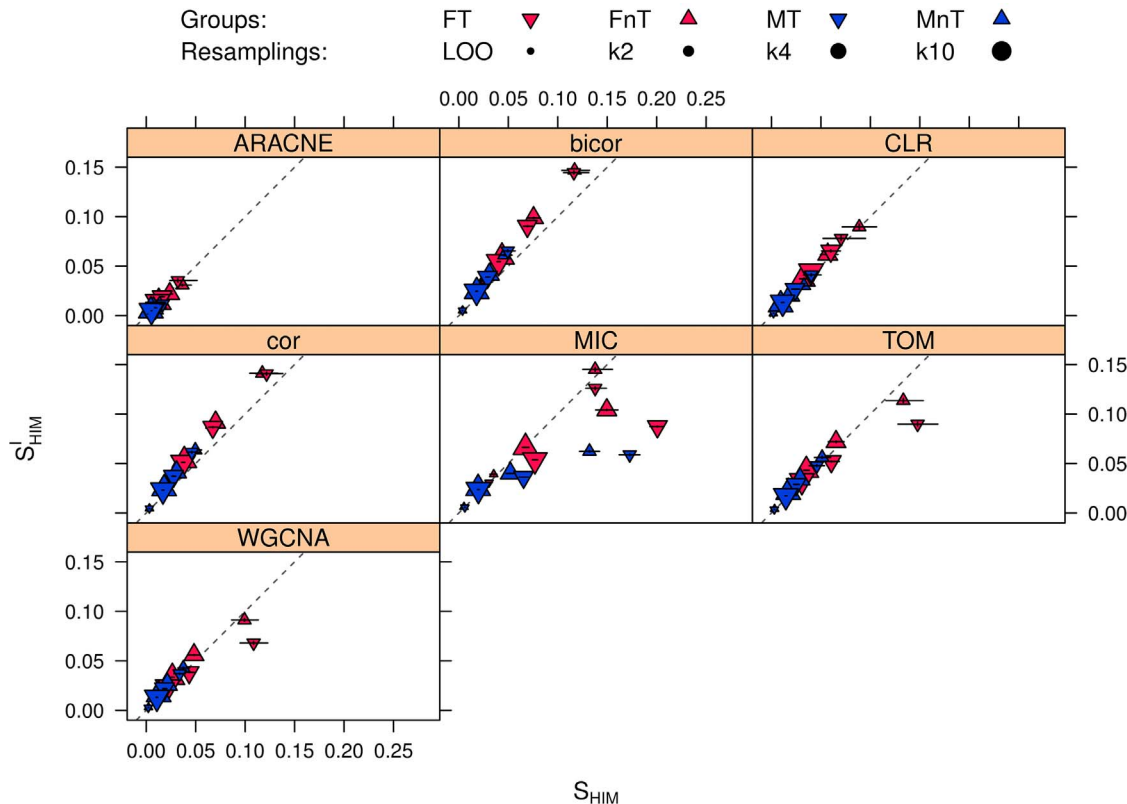

**Figure 18. HCC-B dataset:  $S_{HIM}$  and  $S_{HIM}^I$  stability indicators of the four subgroups MT, MnT, FT, and FnT.** The networks are inferred with six different algorithms for different values of data subsampling. MT: Male Tumoral. MnT: Male non Tumoral. FT: Female Tumoral. FnT: Female non Tumoral. Confidence intervals are represented for each experiment. Points of increasing dimension are used to represent the diverse resampling schema: Leave One Out,  $k$ -fold cross validation for  $k$  set to 2 ( $k2$ ), 4 ( $k4$ ) and 10 ( $k10$ ) respectively. doi:10.1371/journal.pone.0089815.g018

**Table 10.** HCC-B dataset: evaluation of top selected miRNA–miRNA CLR links.

| id  | Node 1                       | Node 2                   | MT  | MnT  | FT   | FnT  |
|-----|------------------------------|--------------------------|-----|------|------|------|
| (a) | hsa-mir-321No1               | hsa-mir-321No2           | 1   | 1    | 9    | 2    |
| (b) | hsa-mir-016b.chr3            | hsa-mir-16.2No1          | 3   | 12   | 15   | 309  |
| (c) | hsa-mir-021-prec-17No1       | hsa-mir-21No1            | 27  | 5    | 2    | 921  |
| (d) | hsa-mir-219.1No1             | hsa-mir-321No2           | 2   | 6    | 1903 | 314  |
| (e) | hsa-mir-326No1               | hsa-mir-342No2           | 132 | 1017 | 3    | -    |
| (f) | hsa-mir-192.2.3No1           | hsa-mir-215.precNo1      | 4   | 300  | 4    | 3340 |
| (g) | hsa-mir-092.prec.13.092.1No2 | hsa-mir-092.prec.X.092.2 | 79  | 1158 | 1    | 404  |

Position in the  $S_w$  ranking for  $k=10$  in the four cases MT, MnT, FT, and FnT.  
doi:10.1371/journal.pone.0089815.t010

we mapped the probes from the first platform into the second with the Bowtie aligner v. 0.12.7 [74] with default parameters. A subset of 120 matching miRNAs was found, which includes 12 miRNAs from Wei's signature. Separately for each dataset, we filtered for probes having a homogeneous fold change for at least 80% of the samples, obtaining 30 miRNAs for HCC-B and 37 for HCC-W, for a total of 54 distinct miRNAs (13 were common). We inferred by CLR two disease networks  $N_B$  and  $N_W$  on these 54 miRNAs, and then computed the weight stability  $S_w$  with  $k=10$  cross-validation for each network.

Within the first 10 top ranked links for  $N_B$ , half (5) included nodes that also belonged to Wei's original signature. Moreover, the second most stable link for  $N_B$  was also present in the same position for the  $N_W$  disease network, which also included 4 miRNAs from Wei's signature in its top 10 most stable edges. The common link is formed by the pair (hsa-mir-17,hsa-mir-20a), which are both strongly associated with cancer, including colorectal cancer [75,76]. It is worth noting that hsa-mir-17 is the most strongly associated miRNA to hsa-mir-20a according to PhenomiR 2.0 [77], being at distance  $<10$  kb [71]. The same range includes hsa-mir92a-1, mapping to the hsa-mir-092.prec.13.092.1No2 probe mentioned above. A concordant overexpression of both hsa-mir-20a and hsa-mir-17 was found for this link for both the two networks  $N_B$  and  $N_W$ .

## Conclusions

We introduced the NetSI family of indicators for assessing the variability of network reconstruction algorithms as functions of a data subsampling procedure. Our aim here is to provide the researchers with an effective tool to compare either the inference

algorithms or properties of the investigated dataset. The first two indicators are global, giving a confidence measure over the whole inferred dataset and are based on a measure of distance between networks. In particular, we demonstrated the proposed framework with the HIM distance, although it is independent from the chosen metric. The other two indicators are local, associating a reliability score to the network nodes and the detected links. They are of particular interest when coupled with algorithms of proven performance, being able to capture the effect of data perturbation on the reconstruction process. We demonstrated their consistency on two synthetic datasets, testing their dependency on different inference methods, and also in comparison with the gold standards. Finally we showed an application for disease networks on miRNA hepatocellular carcinoma data; we found biological or technical evidence for the most stable links in the networks, and good reproducibility on a second dataset having relevant differences in terms of microarray technology and annotation platform.

## Acknowledgments

We thank Daniel Marbach and two anonymous reviewers whose critical feedback greatly helped to improve the manuscript. We also thank Dylan Altschuler, Charles Callaway and Michael and Louise Showe for helpful discussion and comments.

## Author Contributions

Conceived and designed the experiments: GJ MF RV SR. Performed the experiments: GJ MF RV SR. Analyzed the data: GJ MF RV SR. Wrote the paper: GJ SR CF.

## References

- Oates C, Mukherjee S (2012) Network inference and biological dynamics. *Annals of Applied Statistics* 6: 1209–1235.
- Noor A, Serpedin E, Nounou M, Nounou H, Mohamed N, et al. (2013) An Overview of the Statistical Methods Used for Inferring Gene Regulatory Networks and Protein-Protein Interaction Networks. *Advances in Bioinformatics* 2013: Article ID 953814 - 12 pages.
- Zhang B, Horvath S (2005) A General Framework for Weighted Gene Co-Expression Network Analysis. *Statistical Applications in Genetics and Molecular Biology* 4: Article 17.
- Butte A, Tamayo P, Slonim D, Golub T, Kohane I (2000) Discovering functional relationships between RNA expression and chemotherapeutic susceptibility using relevance networks. *Proceedings of the National Academy of Science* 97: 12182–12186.
- Liu Y, Qiao N, Zhu S, Su M, Sun N, et al. (2013) A novel Bayesian network inference algorithm for integrative analysis of heterogeneous deep sequencing data. *Cell Research* 23: 440–443.
- Cai X, Bazerque J, Giannakis G (2013) Inference of Gene Regulatory Networks with Sparse Structural Equation Models Exploiting Genetic Perturbations. *PLoS Computational Biology* 9: e1003068.
- De Smet R, Marchal K (2010) Advantages and limitations of current network inference methods. *Nature Reviews Microbiology* 8: 717–729.
- Kamburov A, Stelzl U, Herwig R (2012) Intscore: a web tool for confidence scoring of biological interactions. *Nucleic Acids Research* 40: W140–W146.
- Feizi S, Marbach D, Médard M, Kellis M (2013) Network deconvolution as a general method to distinguish direct dependencies in networks. *Nature Biotechnology* 31: 726–733.
- Phenix H, Perkins T, Kærn M (2013) Identifiability and inference of pathway motifs by epistasis analysis. *Chaos* 23: 025103.
- Baralla A, Mentzen W, de la Fuente A (2009) Inferring Gene Networks: Dream or Nightmare? *Annals of the New York Academy of Science* 1158: 246–256.
- Meyer P, Alexopoulos L, Bonk T, Califano A, Cho C, et al. (2011) Verification of systems biology research in the age of collaborative competition. *Nature Biotechnology* 29: 811–815.
- He F, Balling R, Zeng AP (2009) Reverse engineering and verification of gene networks: Principles, assumptions, and limitations of present methods and future perspectives. *Journal of Biotechnology* 144: 190–203.

14. Prill R, Marbach D, Saez-Rodriguez J, Sorger P, Alexopoulos L, et al. (2010) Towards a Rigorous Assessment of Systems Biology Models: The DREAM3 Challenges. *PLoS ONE* 5: e9202.
15. Logsdon B, Mezey J (2010) Gene Expression Network Reconstruction by Convex Feature Selection when Incorporating Genetic Perturbations. *PLoS Computational Biology* 6: e1001014.
16. Gillis J, Pavlidis P (2011) The role of indirect connections in gene networks in predicting function. *Bioinformatics* 27: 1860–1866.
17. Miller M, Feng XJ, Li G, Rabitz H (2012) Identifying Biological Network Structure, Predicting Network Behavior, and Classifying Network State With High Dimensional Model Representation (HDMR). *PLoS ONE* 7: e37664.
18. Altay G (2012) Empirically determining the sample size for large-scale gene network inference algorithms. *IET Systems Biology* 6: 35–43.
19. Szederkenyi G, Banga J, Alonso A (2011) Inference of complex biological networks: distinguishability issues and optimization-based solutions. *BMC Systems Biology* 5: 177.
20. Altay G, Emmert-Streib F (2010) Revealing differences in gene network inference algorithms on the network level by ensemble methods. *Bioinformatics* 26: 1738–1744.
21. Krishnan A, Giuliani A, Tomita M (2007) Indeterminacy of Reverse Engineering of Gene Regulatory Networks: The Curse of Gene Elasticity. *PLoS ONE* 2: e562.
22. Madhamshettiwar P, Maetschke S, Davis M, Reverter A, Ragan M (2012) Gene regulatory network inference: evaluation and application to ovarian cancer allows the prioritization of drug targets. *Genome Medicine* 4: 41.
23. Marbach D, Prill RJ, Schaffter T, Mattiussi C, Floreano D, et al. (2010) Revealing strengths and weaknesses of methods for gene network inference. *Proceedings of the National Academy of Science* 107: 6286–6291.
24. Marbach D, Costello J, Kuffner R, Vega N, Prill R, et al. (2012) Wisdom of crowds for robust gene network inference. *Nature Methods* 9: 796–804.
25. Davison A, Hinkley D (1997) *Bootstrap Methods and Their Applications*. Cambridge University Press.
26. Jurman G, Visintainer R, Riccadonna S, Filosi M, Furlanello C (2013) The HIM global metric and kernel for network comparison and classification. *ArXiv:1201.2931 [math.CO]*.
27. Barla A, Jurman G, Visintainer R, Squillario M, Filosi M, et al. (2013) A Machine Learning Pipeline for Discriminant Pathways Identification. In: Kasabov N, editor, *Springer Handbook of Bio-/Neuroinformatics*. Berlin: Springer Verlag, chapter 53. p. 1200.
28. Margolin A, Nemenman I, Basso K, Wiggins C, Stolovitzky G, et al. (2006) ARACNE: an algorithm for the reconstruction of gene regulatory networks in a mammalian cellular context. *BMC Bioinformatics* 7: S7.
29. Faith J, Hayete B, Thaden J, Mogno I, Wierzbowski J, et al. (2007) Large-Scale Mapping and Validation of *Escherichia coli* Transcriptional Regulation from a Compendium of Expression Profiles. *PLoS Biology* 5: e8.
30. Horvath S (2011) *Weighted Network Analysis: Applications in Genomics and Systems Biology*. Springer.
31. Budhu A, Jia HL, Forgues M, Liu CG, Goldstein D, et al. (2008) Identification of Metastasis-Related MicroRNAs in Hepatocellular Carcinoma. *Hepatology* 47: 897–907.
32. Ji J, Shi J, Budhu A, Yu Z, Forgues M, et al. (2009) MicroRNA Expression, Survival, and Response to Interferon in Liver Cancer. *New England Journal of Medicine* 361: 1437–1447.
33. Visintainer R (2012) Distances and Stability in Biological Network Theory. Ph.D. thesis, DISI, University of Trento.
34. Tun K, Dhar P, Palumbo M, Giuliani A (2006) Metabolic pathways variability and sequence/ networks comparisons. *BMC Bioinformatics* 7: 24.
35. Dougherty E (2010) Validation of gene regulatory networks: scientific and inferential. *Briefings in Bioinformatics* 12: 245–252.
36. Ipsen M, Mikhailov A (2002) Evolutionary reconstruction of networks. *Physical Review E* 66: 046109.
37. Jurman G, Visintainer R, Furlanello C (2011) An introduction to spectral distances in networks. *Frontiers in Artificial Intelligence and Applications* 226: 227–234.
38. Fay D, Moore A, Filosi M, Jurman G (2013) Graph metrics as summary statistics for Approximate Bayesian Computation with application to network model parameter estimation. In press.
39. Chung F (1997) *Spectral Graph Theory*. American Mathematical Society.
40. Spielman D (2009) *Spectral Graph Theory: The Laplacian (Lecture 2)*. Lecture notes.
41. Tönjes R, Blasius B (2009) Perturbation Analysis of Complete Synchronization in Networks of Phase Oscillators. *Physical Review E* 80: 026202.
42. Atay F, Biykoğlu T, Jost J (2006) Network synchronization: Spectral versus statistical properties. *Physica D Nonlinear Phenomena* 224: 35–41.
43. Langfelder P, Horvath S (2008) WGCNA: an R package for weighted correlation network analysis. *BMC Bioinformatics* 9: 559.
44. Song L, Langfelder P, Horvath S (2012) Comparison of co-expression measures: mutual information, correlation, and model based indices. *BMC Bioinformatics* 13: 328.
45. Reshef D, Reshef Y, Finucane H, Grossman S, McVean G, et al. (2011) Detecting novel associations in large datasets. *Science* 6062: 1518–1524.
46. Speed T (2011) A Correlation for the 21st Century. *Science* 6062: 1502–1503.
47. *Nature Biotechnology* (2012) Finding correlations in big data. *Nature Biotechnology* 30: 334–335.
48. Albanese D, Filosi M, Visintainer R, Riccadonna S, Jurman G, et al. (2013) minerva and minepy: a C engine for the MINE suite and its R, Python and MATLAB wrappers. *Bioinformatics* 29: 407–408.
49. Ambroise J, Robert A, Macq B, Gala JL (2012) Transcriptional Network Inference from Functional Similarity and Expression Data: A Global Supervised Approach. *Statistical Applications in Genetics and Molecular Biology* 11: Article 2.
50. Schaffter T, Marbach D, Floreano D (2011) GeneNetWeaver: in silico benchmark generation and performance profiling of network inference methods. *Bioinformatics* 27: 2263–2270.
51. Jiao Y, Lawler K, Patel G, Purushotham A, Jones A, et al. (2011) DART: Denoising Algorithm based on Relevance network Topology improves molecular pathway activity inference. *BMC Bioinformatics* 12: 403.
52. Allen J, Xie Y, Chen M, Girard L, Xiao G (2012) Comparing Statistical Methods for Constructing Large Scale Gene Networks. *PLoS ONE* 7: e29348.
53. Volinia S, Galasso M, Costinean S, Tagliavini L, Gamberoni G, et al. (2010) Reprogramming of miRNA networks in cancer and leukemia. *Genome Research* 20: 589–599.
54. Bandyopadhyay S, Mitra R, Maulik U, Zhang M (2010) Development of the human cancer microRNA network. *Silence* 1: 6.
55. Law PTY, Wong N (2011) Emerging roles of microRNA in the intracellular signaling networks of hepatocellular carcinoma. *Journal of Gastroenterology and Hepatology* 26: 437–449.
56. Gu Z, Zhang C, Wang J (2012) Gene regulation is governed by a core network in hepatocellular carcinoma. *BMC Systems Biology* 6: 32.
57. Troyanskaya O, Cantor M, Sherlock G, Brown P, Hastie T, et al. (2001) Missing value estimation methods for DNA microarrays. *Bioinformatics* 17: 520–525.
58. Wei RR, Huang GL, Zhang MY, Li BK, Zhang HZ, et al. (2013) Clinical significance and prognostic value of microRNA expression signatures in hepatocellular carcinoma. *Clinical Cancer Research* 19: 4780–4791.
59. Krzywinski M, Birol I, Jones S, Marra M (2012) Hive plots-rational approach to visualizing networks. *Briefings in Bioinformatics* 13: 627–644.
60. Asangani I, Rasheed S, Nikolova D, Leupold J, Colburn N, et al. (2008) MicroRNA-21 (miR-21) post-transcriptionally downregulates tumor suppressor Pdc4 and stimulates invasion, intravasation and metastasis in colorectal cancer. *Oncogene* 27: 2128–2136.
61. Mellios N, Galdzicka M, Gimms E, Baker S, Rogav E, et al. (2012) Gender-Specific Reduction of Estrogen-Sensitive Small RNA, miR-30b, in Subjects With Schizophrenia. *Schizophrenia Bulletin* 38: 433–443.
62. Zhang L, Huang J, Yang N, Greshock J, Megraw M, et al. (2006) microRNAs exhibit high frequency genomic alterations in human cancer. *Proceedings of the National Academy of Science* 103: 9136–9141.
63. Qiu S, Lin S, Hu D, Feng Y, Tan Y, et al. (2013) Interactions of miR-323/miR-326/miR-329 and miR-130a/miR-155/miR-210 as prognostic indicators for clinical outcome of glioblastoma patients. *Journal of Translational Medicine* 11: 10.
64. Kefas B, Comeau L, Floyd D, Selevstov O, Godlewski J, et al. (2009) The Neuronal MicroRNA miR-326 Acts in a Feedback Loop with Notch and Has Therapeutic Potential against Brain Tumors. *The Journal of Neuroscience* 29: 15161–15168.
65. Varnholt H, Dreber U, Schulze F, Wedemeyer I, Schirmacher P, et al. (2008) MicroRNA gene expression profile of hepatitis C virus-associated hepatocellular carcinoma. *Hepatology* 47: 1223–1232.
66. Li X, Yang W, Lou L, Chen Y, Wu S, et al. (2014) microRNA: A Promising Diagnostic Biomarker and Therapeutic Target for Hepatocellular Carcinoma. *Digestive Diseases and Sciences January* 2014: 1–9.
67. Braum C, Zhang X, Savelieva I, Wolf S, Moll U, et al. (2008) p53-Responsive MicroRNAs 192 and 215 Are Capable of Inducing Cell Cycle Arrest. *Cancer Research* 68: 10094–10104.
68. Georges S, Biery M, Kim S, Schelter J, Guo J, et al. (2008) Coordinated Regulation of Cell Cycle Transcripts by p53-Inducible microRNAs, miR-192 and miR-215. *Cancer Research* 68: 10105–10112.
69. Pichiotti F, Suh SS, Rocci A, Luca LD, Taccioli C, et al. (2010) Downregulation of p53-inducible microRNAs 192, 194, and 215 Impairs the p53/MDM2 Autoregulatory Loop in Multiple Myeloma Development. *Cancer Cell* 18: 367–381.
70. Jiang J, Gusev Y, Aderca I, Mettler T, Nagorney D, et al. (2008) Association of MicroRNA Expression in Hepatocellular Carcinomas with Hepatitis Infection, Cirrhosis, and Patient Survival. *Clinical Cancer Research* 14: 419–427.
71. Kozomara A, Griffiths-Jones S (2011) miRBase: integrating microRNA annotation and deepsequencing data. *Nucleic Acids Research* 39: D152–D157.
72. Altschul SF, Gish W, Miller W, Myers EW, Lipman DJ (1990) Basic local alignment search tool. *Journal of Molecular Biology* 215: 403–410.
73. Calin G, Liu CG, Sevignani C, Ferracin M, Felli N, et al. (2004) MicroRNA profiling reveals distinct signatures in B cell chronic lymphocytic leukemias. *Proceedings of the National Academy of Sciences* 101: 11755–11760.
74. Langmead B, Trapnell C, Pop M, Salzberg S (2009) Ultrafast and memory-efficient alignment of short DNA sequences to the human genome. *Genome Biology* 10: R25.
75. Murakami Y, Yasuda T, Saigo K, Urashima T, Toyoda H, et al. (2005) Comprehensive analysis of microRNA expression patterns in hepatocellular carcinoma and non-tumorous tissues. *Oncogene* 25: 2537–2545.
76. Connolly E, Melegari M, Landgraf P, Tchaikovskaya T, Tennant BC, et al. (2008) Elevated expression of the mir-17-92 polycistron and mir-21 in

hepadnavirus-associated hepatocellular carcinoma contributes to the malignant phenotype. *The American Journal of Pathology* 173: 856 – 864.

77. Ruepp A, Kowarsch A, Schmidl D, Buggenthin F, Brauner B, et al. (2010) PhenomiR: a knowledgebase for microRNA expression in diseases and biological processes. *Genome Biology* 11: R6.
